# Supplementary material
Source: HighWire-hosted journal article supplement (https://www.cmajopen.ca/highwire/filestream/80895/field_highwire_adjunct_files/0/open-2014-0037-1-at.pdf)
Supplement: open-2014-0037-1-at.pdf [file open-2014-0037-1-at.pdf]

**Appendix 1 (as submitted by the authors): Duration of exposure to sunlight, by skin type, site, time of day and month**

**Table 1: Duration (in min) required to synthesize the standard vitamin D dose of 1000 IU with 1/4 of the body exposed to 1/4 of the minimal erythemal dose by site, time of day, and month in type II skinned individuals. Yellow areas represent periods when the ultraviolet index is above 3 and sun protection guidelines are recommended; green areas represent periods when the ultraviolet index is below 3 and duration is 30 min or less; orange areas represent periods when the ultraviolet index is below 3 and duration is between 31 and 60 min; and gray areas represent periods when the ultraviolet index is below 3 and duration is greater than 60 min.**

| City                                          | Month | Time of Day |      |      |      |      |      |     |     |     |     |     |     |      |      |      |      |      |     |
|-----------------------------------------------|-------|-------------|------|------|------|------|------|-----|-----|-----|-----|-----|-----|------|------|------|------|------|-----|
|                                               |       | 3           | 4    | 5    | 6    | 7    | 8    | 9   | 10  | 11  | 12  | 13  | 14  | 15   | 16   | 17   | 18   | 19   | 20  |
| Bedford/Dartmouth, NS<br>(44.7 N, 63.61 W)    | Jan   | --          | --   | --   | --   | 2083 | 321  | 116 | 66  | 53  | 53  | 68  | 123 | 321  | 1389 | --   | --   | --   | --  |
|                                               | Feb   | --          | --   | --   | 2083 | 463  | 130  | 58  | 36  | 29  | 29  | 36  | 60  | 134  | 521  | 4167 | --   | --   | --  |
|                                               | Mar   | --          | --   | --   | 694  | 154  | 58   | 29  | 20  | 17  | 17  | 21  | 31  | 58   | 160  | 833  | 4167 | --   | --  |
|                                               | Apr   | --          | --   | 1042 | 231  | 74   | 31   | 19  | 14  | 12  | 12  | 14  | 19  | 33   | 76   | 245  | 1389 | --   | --  |
|                                               | May   | --          | 2083 | 417  | 110  | 43   | 22   | 13  | 10  | 9   | 9   | 10  | 14  | 22   | 41   | 104  | 417  | 2083 | --  |
|                                               | June  | --          | 1389 | 260  | 77   | 33   | 18   | 11  | 8   | 7   | 7   | 8   | 11  | 17   | 30   | 74   | 278  | 2083 | --  |
|                                               | July  | --          | 2083 | 321  | 82   | 34   | 18   | 11  | 8   | 7   | 7   | 8   | 11  | 17   | 29   | 76   | 298  | 2083 | --  |
|                                               | Aug   | --          | --   | 595  | 144  | 46   | 22   | 13  | 9   | 8   | 8   | 9   | 12  | 21   | 44   | 130  | 833  | 4167 | --  |
|                                               | Sept  | --          | --   | 1389 | 347  | 85   | 34   | 18  | 12  | 11  | 11  | 13  | 19  | 34   | 85   | 379  | 2083 | --   | --  |
|                                               | Oct   | --          | --   | --   | 1042 | 245  | 74   | 36  | 23  | 18  | 19  | 23  | 37  | 73   | 260  | 1389 | --   | --   | --  |
|                                               | Nov   | --          | --   | --   | --   | 694  | 219  | 80  | 48  | 38  | 39  | 51  | 85  | 219  | 1042 | --   | --   | --   | --  |
|                                               | Dec   | --          | --   | --   | --   | 2083 | 463  | 154 | 80  | 62  | 64  | 85  | 160 | 521  | 2083 | --   | --   | --   | --  |
| Goose Bay, Newfoundland<br>(53.32 N, 60.36 W) | Jan   | --          | --   | --   | --   | 4167 | 833  | 260 | 123 | 93  | 95  | 123 | 231 | 694  | n/a  | --   | --   | --   | --  |
|                                               | Feb   | --          | --   | --   | 4167 | 833  | 219  | 85  | 54  | 43  | 43  | 54  | 85  | 208  | 833  | n/a  | --   | --   | --  |
|                                               | Mar   | --          | --   | 4167 | 694  | 189  | 64   | 36  | 25  | 21  | 21  | 24  | 34  | 65   | 181  | 694  | n/a  | --   | --  |
|                                               | Apr   | --          | --   | 347  | 174  | 60   | 31   | 19  | 14  | 12  | 12  | 14  | 19  | 30   | 60   | 139  | --   | --   | --  |
|                                               | May   | --          | --   | 298  | 89   | 45   | 25   | 16  | 12  | 11  | 11  | 12  | 16  | 23   | 43   | 97   | 208  | --   | --  |
|                                               | June  | --          | --   | 189  | 69   | 34   | 21   | 14  | 11  | 10  | 10  | 11  | 15  | 21   | 33   | 62   | 160  | --   | --  |
|                                               | July  | --          | --   | 260  | 80   | 39   | 23   | 15  | 12  | 11  | 11  | 13  | 16  | 24   | 39   | 83   | 198  | --   | --  |
|                                               | Aug   | --          | --   | 278  | 126  | 52   | 26   | 17  | 12  | 11  | 12  | 14  | 18  | 27   | 56   | 139  | --   | --   | --  |
|                                               | Sept  | --          | --   | 4167 | 417  | 130  | 51   | 30  | 21  | 18  | 18  | 22  | 30  | 55   | 134  | 417  | n/a  | --   | --  |
|                                               | Oct   | --          | --   | --   | 4167 | 521  | 160  | 65  | 45  | 37  | 38  | 46  | 69  | 174  | 521  | 4167 | --   | --   | --  |
|                                               | Nov   | --          | --   | --   | --   | 4167 | 463  | 189 | 97  | 77  | 79  | 99  | 189 | 521  | 4167 | --   | --   | --   | --  |
|                                               | Dec   | --          | --   | --   | --   | --   | 4167 | 379 | 160 | 130 | 134 | 181 | 347 | 1389 | --   | --   | --   | --   | --  |
| Montreal/Dorval, Quebec<br>(45.48 N, 73.75 W) | Jan   | --          | --   | --   | --   | --   | 260  | 97  | 55  | 43  | 43  | 57  | 102 | 278  | 2083 | n/a  | --   | --   | --  |
|                                               | Feb   | --          | --   | --   | --   | 321  | 107  | 47  | 30  | 24  | 24  | 30  | 48  | 107  | 463  | 4167 | --   | --   | --  |
|                                               | Mar   | --          | --   | --   | 379  | 119  | 46   | 24  | 17  | 14  | 14  | 17  | 26  | 46   | 126  | 833  | n/a  | --   | --  |
|                                               | Apr   | --          | --   | 521  | 189  | 66   | 28   | 17  | 13  | 11  | 11  | 12  | 17  | 29   | 64   | 198  | 2083 | n/a  | --  |
|                                               | May   | --          | --   | 321  | 91   | 36   | 19   | 12  | 9   | 8   | 8   | 10  | 13  | 20   | 38   | 110  | 417  | 4167 | --  |
|                                               | June  | --          | --   | 219  | 69   | 30   | 16   | 10  | 8   | 7   | 7   | 8   | 11  | 15   | 29   | 76   | 231  | 2083 | n/a |
|                                               | July  | --          | --   | 231  | 71   | 29   | 16   | 10  | 8   | 7   | 7   | 8   | 11  | 16   | 30   | 82   | 278  | 4167 | n/a |
|                                               | Aug   | --          | --   | 417  | 116  | 41   | 19   | 12  | 9   | 8   | 8   | 9   | 12  | 20   | 40   | 126  | 833  | n/a  | --  |
|                                               | Sept  | --          | --   | --   | 298  | 85   | 34   | 18  | 13  | 11  | 11  | 14  | 20  | 35   | 99   | 417  | 4167 | --   | --  |

Appendix to: Gill P, Kalia S. Assessment of the feasibility of using sunlight exposure to obtain the recommended level of vitamin D in Canada. *CMAJ Open* 2015. DOI:10.9788/cmajo.20140037. Copyright © 2015 The Author(s) or their employer(s). To receive this resource in an accessible format, please contact us at [cmajgroup@cmaj.ca](mailto:cmajgroup@cmaj.ca).

|  |     |    |    |    |     |     |     |     |    |    |    |    |     |     |      |      |    |    |    |
|--|-----|----|----|----|-----|-----|-----|-----|----|----|----|----|-----|-----|------|------|----|----|----|
|  | Oct | -- | -- | -- | 833 | 245 | 79  | 37  | 24 | 19 | 20 | 25 | 38  | 83  | 298  | 4167 | -- | -- | -- |
|  | Nov | -- | -- | -- | --  | 417 | 231 | 93  | 53 | 43 | 43 | 55 | 97  | 260 | 2083 | n/a  | -- | -- | -- |
|  | Dec | -- | -- | -- | --  | --  | 347 | 144 | 77 | 58 | 60 | 79 | 149 | 463 | 4167 | --   | -- | -- | -- |

|                                                  |      |    |      |      |      |      |     |     |    |    |    |    |     |     |      |      |      |      |     |
|--------------------------------------------------|------|----|------|------|------|------|-----|-----|----|----|----|----|-----|-----|------|------|------|------|-----|
| Toronto/Downsview, Ontario<br>(43.78 N, 79.47 W) | Jan  | -- | --   | --   | --   | 2083 | 298 | 104 | 58 | 44 | 45 | 59 | 104 | 298 | 2083 | --   | --   | --   | --  |
|                                                  | Feb  | -- | --   | --   | 4167 | 463  | 113 | 48  | 30 | 24 | 25 | 31 | 51  | 119 | 463  | 4167 | --   | --   | --  |
|                                                  | Mar  | -- | --   | 4167 | 833  | 149  | 50  | 26  | 18 | 15 | 15 | 19 | 28  | 53  | 144  | 833  | 4167 | --   | --  |
|                                                  | Apr  | -- | n/a  | 1389 | 219  | 67   | 29  | 17  | 12 | 11 | 11 | 12 | 18  | 30  | 64   | 219  | 2083 | --   | --  |
|                                                  | May  | -- | 4167 | 417  | 93   | 34   | 18  | 11  | 9  | 8  | 8  | 9  | 13  | 20  | 36   | 102  | 417  | 4167 | --  |
|                                                  | June | -- | 4167 | 260  | 72   | 29   | 15  | 10  | 7  | 7  | 7  | 8  | 11  | 17  | 30   | 80   | 278  | 4167 | n/a |
|                                                  | July | -- | 4167 | 260  | 68   | 27   | 14  | 9   | 7  | 6  | 7  | 8  | 10  | 16  | 30   | 82   | 278  | 4167 | --  |
|                                                  | Aug  | -- | 4167 | 833  | 123  | 39   | 18  | 11  | 9  | 8  | 8  | 9  | 12  | 20  | 39   | 134  | 833  | 4167 | --  |
|                                                  | Sept | -- | --   | 4167 | 347  | 80   | 30  | 17  | 12 | 10 | 10 | 12 | 18  | 32  | 83   | 379  | 4167 | --   | --  |
|                                                  | Oct  | -- | --   | --   | 2083 | 245  | 72  | 33  | 21 | 18 | 18 | 22 | 34  | 77  | 278  | 2083 | --   | --   | --  |
|                                                  | Nov  | -- | --   | --   | n/a  | 1389 | 219 | 76  | 46 | 36 | 38 | 49 | 85  | 231 | 1389 | n/a  | --   | --   | --  |
|                                                  | Dec  | -- | --   | --   | --   | 4167 | 463 | 144 | 71 | 53 | 54 | 74 | 160 | 463 | 4167 | --   | --   | --   | --  |

|                                         |      |      |      |      |      |      |     |     |     |    |    |     |     |     |      |      |      |      |      |
|-----------------------------------------|------|------|------|------|------|------|-----|-----|-----|----|----|-----|-----|-----|------|------|------|------|------|
| Winnipeg, Manitoba<br>(49.9 N, 97.24 W) | Jan  | --   | --   | --   | --   | 2083 | 417 | 123 | 67  | 53 | 51 | 64  | 110 | 417 | 4167 | --   | --   | --   | --   |
|                                         | Feb  | --   | --   | --   | 4167 | 694  | 126 | 57  | 36  | 29 | 28 | 35  | 56  | 123 | 694  | 4167 | --   | --   | --   |
|                                         | Mar  | --   | --   | 4167 | 694  | 130  | 53  | 29  | 19  | 16 | 16 | 19  | 29  | 53  | 134  | 833  | 4167 | --   | --   |
|                                         | Apr  | --   | 4167 | 833  | 174  | 60   | 29  | 17  | 12  | 11 | 11 | 13  | 18  | 30  | 62   | 160  | 1042 | 4167 | --   |
|                                         | May  | --   | 2083 | 298  | 82   | 35   | 19  | 13  | 10  | 9  | 9  | 10  | 13  | 21  | 38   | 89   | 231  | 2083 | --   |
|                                         | June | 4167 | 1042 | 181  | 65   | 29   | 16  | 11  | 9   | 8  | 8  | 9   | 12  | 18  | 31   | 67   | 167  | 833  | 4167 |
|                                         | July | --   | 1389 | 189  | 64   | 28   | 15  | 10  | 8   | 7  | 7  | 8   | 11  | 17  | 31   | 72   | 174  | 1389 | --   |
|                                         | Aug  | --   | 4167 | 521  | 95   | 40   | 20  | 12  | 9   | 8  | 8  | 10  | 13  | 21  | 42   | 110  | 521  | 4167 | --   |
|                                         | Sept | --   | --   | 2083 | 379  | 77   | 36  | 20  | 14  | 12 | 12 | 15  | 22  | 40  | 91   | 379  | 4167 | --   | --   |
|                                         | Oct  | --   | --   | --   | 2083 | 379  | 89  | 47  | 30  | 25 | 25 | 31  | 49  | 102 | 347  | 4167 | --   | --   | --   |
|                                         | Nov  | --   | --   | --   | --   | 2083 | 347 | 102 | 63  | 47 | 48 | 60  | 104 | 347 | 4167 | --   | --   | --   | --   |
|                                         | Dec  | --   | --   | --   | --   | 4167 | 833 | 208 | 104 | 77 | 76 | 104 | 189 | 694 | 4167 | --   | --   | --   | --   |

|                                           |      |      |      |      |      |      |      |      |     |     |     |     |      |      |      |      |      |      |      |
|-------------------------------------------|------|------|------|------|------|------|------|------|-----|-----|-----|-----|------|------|------|------|------|------|------|
| Churchill, Manitoba<br>(58.75 N, 94.07 W) | Jan  | --   | --   | --   | --   | 2083 | 417  | 208  | 160 | 160 | 219 | 463 | 2083 | --   | --   | --   | --   | --   |      |
|                                           | Feb  | --   | --   | --   | --   | 2083 | 245  | 130  | 68  | 57  | 57  | 72  | 116  | 245  | 2083 | --   | --   | --   | --   |
|                                           | Mar  | --   | --   | 2083 | 521  | 149  | 66   | 34   | 25  | 21  | 21  | 25  | 35   | 65   | 144  | 595  | 4167 | --   | --   |
|                                           | Apr  | --   | 4167 | 417  | 130  | 50   | 29   | 17   | 13  | 12  | 12  | 13  | 18   | 27   | 51   | 126  | 595  | 4167 | --   |
|                                           | May  | 4167 | 595  | 198  | 69   | 36   | 20   | 14   | 11  | 10  | 10  | 11  | 14   | 20   | 34   | 67   | 174  | 694  | 4167 |
|                                           | June | 1389 | 298  | 104  | 54   | 32   | 19   | 14   | 11  | 10  | 10  | 11  | 13   | 19   | 30   | 51   | 126  | 463  | 1389 |
|                                           | July | 4167 | 379  | 149  | 62   | 35   | 19   | 14   | 11  | 10  | 10  | 11  | 14   | 20   | 32   | 60   | 149  | 521  | 4167 |
|                                           | Aug  | --   | 2083 | 347  | 119  | 53   | 30   | 19   | 15  | 13  | 14  | 15  | 20   | 31   | 56   | 126  | 347  | 2083 | --   |
|                                           | Sept | --   | --   | 2083 | 379  | 149  | 71   | 42   | 28  | 25  | 24  | 28  | 40   | 69   | 149  | 463  | 4167 | --   | --   |
|                                           | Oct  | --   | --   | --   | 4167 | 1042 | 219  | 110  | 66  | 55  | 56  | 69  | 110  | 219  | 1042 | 2083 | --   | --   | --   |
|                                           | Nov  | --   | --   | --   | --   | 4167 | 1389 | 298  | 160 | 123 | 123 | 160 | 321  | 1389 | 4167 | --   | --   | --   | --   |
|                                           | Dec  | --   | --   | --   | --   | --   | 4167 | 1042 | 379 | 260 | 260 | 379 | 833  | 4167 | --   | --   | --   | --   | --   |



|                                                             |      |    |     |      |     |     |     |     |    |    |    |    |     |     |     |     |     |    |    |
|-------------------------------------------------------------|------|----|-----|------|-----|-----|-----|-----|----|----|----|----|-----|-----|-----|-----|-----|----|----|
| Bratts Lake (Regina), Saskatchewan<br>(50.205 N, 104.705 W) | Jan  | -- | --  | --   | --  | --  | 231 | 104 | 58 | 44 | 45 | 60 | 107 | 260 | --  | --  | --  | -- | -- |
|                                                             | Feb  | -- | --  | --   | --  | 260 | 110 | 51  | 31 | 24 | 26 | 32 | 52  | 119 | 298 | --  | --  | -- | -- |
|                                                             | Mar  | -- | --  | --   | 321 | 119 | 44  | 24  | 16 | 14 | 14 | 16 | 24  | 44  | 119 | 278 | --  | -- | -- |
|                                                             | Apr  | -- | --  | 4167 | 160 | 57  | 27  | 17  | 12 | 11 | 11 | 13 | 18  | 28  | 57  | 174 | 417 | -- | -- |
|                                                             | May  | -- | --  | 219  | 80  | 34  | 17  | 12  | 9  | 8  | 9  | 10 | 13  | 19  | 35  | 83  | 245 | -- | -- |
|                                                             | June | -- | 463 | 181  | 63  | 28  | 16  | 12  | 8  | 8  | 8  | 9  | 12  | 17  | 29  | 60  | 198 | -- | -- |
|                                                             | July | -- | --  | 174  | 56  | 26  | 14  | 10  | 7  | 7  | 7  | 8  | 10  | 15  | 26  | 60  | 189 | -- | -- |
|                                                             | Aug  | -- | --  | 321  | 102 | 39  | 19  | 12  | 9  | 8  | 8  | 9  | 12  | 19  | 37  | 104 | 278 | -- | -- |
|                                                             | Sept | -- | --  | --   | 245 | 83  | 36  | 20  | 14 | 12 | 12 | 14 | 19  | 34  | 85  | 231 | --  | -- | -- |
|                                                             | Oct  | -- | --  | --   | --  | 245 | 97  | 45  | 29 | 23 | 24 | 29 | 47  | 102 | 219 | --  | --  | -- | -- |
|                                                             | Nov  | -- | --  | --   | --  | --  | 260 | 104 | 60 | 46 | 46 | 58 | 104 | 208 | --  | --  | --  | -- | -- |
|                                                             | Dec  | -- | --  | --   | --  | --  | --  | 167 | 91 | 71 | 72 | 95 | 174 | 417 | --  | --  | --  | -- | -- |

|                                                |      |    |    |     |     |     |     |     |     |    |    |     |     |     |     |     |     |    |    |
|------------------------------------------------|------|----|----|-----|-----|-----|-----|-----|-----|----|----|-----|-----|-----|-----|-----|-----|----|----|
| Saskatoon, Saskatchewan<br>(52.11 N, 106.71 W) | Jan  | -- | -- | --  | --  | --  | 463 | 149 | 83  | 63 | 64 | 83  | 130 | 521 | --  | --  | --  | -- | -- |
|                                                | Feb  | -- | -- | --  | --  | --  | 139 | 63  | 40  | 31 | 32 | 39  | 64  | 119 | 521 | --  | --  | -- | -- |
|                                                | Mar  | -- | -- | --  | 231 | 144 | 57  | 30  | 21  | 17 | 17 | 21  | 32  | 61  | 134 | --  | --  | -- | -- |
|                                                | Apr  | -- | -- | --  | 181 | 66  | 32  | 19  | 14  | 13 | 12 | 15  | 19  | 32  | 69  | 174 | --  | -- | -- |
|                                                | May  | -- | -- | 219 | 85  | 34  | 19  | 13  | 10  | 9  | 9  | 11  | 13  | 20  | 39  | 82  | 189 | -- | -- |
|                                                | June | -- | -- | 167 | 56  | 27  | 17  | 11  | 9   | 8  | 8  | 9   | 12  | 19  | 28  | 64  | 160 | -- | -- |
|                                                | July | -- | -- | 174 | 56  | 26  | 16  | 11  | 8   | 8  | 7  | 8   | 11  | 17  | 30  | 61  | 160 | -- | -- |
|                                                | Aug  | -- | -- | 219 | 123 | 38  | 19  | 13  | 10  | 9  | 8  | 10  | 14  | 19  | 46  | 119 | 174 | -- | -- |
|                                                | Sept | -- | -- | --  | 181 | 113 | 37  | 21  | 15  | 12 | 13 | 15  | 22  | 43  | 104 | 167 | --  | -- | -- |
|                                                | Oct  | -- | -- | --  | --  | 181 | 126 | 52  | 33  | 26 | 27 | 35  | 53  | 113 | 181 | --  | --  | -- | -- |
|                                                | Nov  | -- | -- | --  | --  | --  | 245 | 154 | 82  | 60 | 63 | 83  | 130 | 463 | --  | --  | --  | -- | -- |
|                                                | Dec  | -- | -- | --  | --  | --  | 833 | 231 | 134 | 93 | 91 | 113 | 245 | 833 | --  | --  | --  | -- | -- |

|                                            |      |     |      |      |      |      |     |     |     |    |    |     |     |     |     |      |      |     |    |
|--------------------------------------------|------|-----|------|------|------|------|-----|-----|-----|----|----|-----|-----|-----|-----|------|------|-----|----|
| Stony Plain, Alberta<br>(53.55 N, 114.1 W) | Jan  | --  | --   | --   | --   | 4167 | 694 | 219 | 107 | 82 | 82 | 113 | 208 | 694 | n/a | --   | --   | --  | -- |
|                                            | Feb  | --  | --   | --   | 4167 | 833  | 198 | 77  | 48  | 39 | 38 | 49  | 80  | 181 | 833 | n/a  | --   | --  | -- |
|                                            | Mar  | --  | --   | 4167 | 595  | 174  | 58  | 33  | 22  | 18 | 18 | 22  | 32  | 61  | 160 | 694  | n/a  | --  | -- |
|                                            | Apr  | --  | n/a  | 833  | 219  | 54   | 29  | 19  | 14  | 12 | 13 | 15  | 20  | 32  | 65  | 181  | 694  | --  | -- |
|                                            | May  | n/a | 1389 | 260  | 60   | 36   | 20  | 14  | 11  | 10 | 10 | 12  | 16  | 24  | 37  | 85   | 245  | 833 | -- |
|                                            | June | n/a | 1042 | 260  | 53   | 28   | 18  | 12  | 10  | 9  | 9  | 10  | 12  | 19  | 33  | 67   | 167  | 694 | -- |
|                                            | July | n/a | 833  | 208  | 50   | 27   | 16  | 11  | 8   | 8  | 8  | 9   | 11  | 17  | 29  | 64   | 189  | 833 | -- |
|                                            | Aug  | --  | 4167 | 417  | 134  | 39   | 19  | 14  | 10  | 9  | 9  | 10  | 14  | 21  | 46  | 116  | 417  | --  | -- |
|                                            | Sept | --  | --   | 4167 | 321  | 113  | 41  | 23  | 16  | 14 | 14 | 17  | 25  | 43  | 116 | 347  | 4167 | --  | -- |
|                                            | Oct  | --  | --   | --   | 4167 | 379  | 144 | 56  | 38  | 30 | 30 | 38  | 56  | 139 | 417 | 4167 | --   | --  | -- |

|                                           |             |     |      |      |      |      |      |     |     |     |     |     |     |      |      |      |      |      |     |
|-------------------------------------------|-------------|-----|------|------|------|------|------|-----|-----|-----|-----|-----|-----|------|------|------|------|------|-----|
|                                           | <b>Nov</b>  | --  | --   | --   | --   | 4167 | 417  | 181 | 91  | 69  | 69  | 91  | 174 | 521  | 4167 | --   | --   | --   | --  |
|                                           | <b>Dec</b>  | --  | --   | --   | --   | --   | 4167 | 347 | 160 | 123 | 123 | 174 | 347 | 1389 | n/a  | --   | --   | --   | --  |
| Saturna Island, BC<br>(48.78 N, 123.13 W) | <b>Jan</b>  | --  | --   | --   | --   | 4167 | 694  | 219 | 123 | 93  | 91  | 119 | 219 | 694  | 4167 | --   | --   | --   | --  |
|                                           | <b>Feb</b>  | --  | --   | --   | 4167 | 833  | 208  | 95  | 56  | 45  | 43  | 51  | 83  | 198  | 833  | n/a  | --   | --   | --  |
|                                           | <b>Mar</b>  | --  | --   | 4167 | 1042 | 198  | 74   | 40  | 27  | 22  | 22  | 27  | 38  | 69   | 189  | 833  | n/a  | --   | --  |
|                                           | <b>Apr</b>  | --  | n/a  | 1389 | 198  | 65   | 30   | 18  | 13  | 11  | 11  | 13  | 18  | 30   | 63   | 198  | 1389 | n/a  | --  |
|                                           | <b>May</b>  | --  | 4167 | 298  | 97   | 39   | 21   | 13  | 10  | 8   | 8   | 9   | 12  | 19   | 35   | 83   | 260  | 2083 | n/a |
|                                           | <b>June</b> | n/a | 1042 | 174  | 63   | 28   | 16   | 11  | 8   | 7   | 7   | 8   | 10  | 15   | 27   | 63   | 198  | 1389 | n/a |
|                                           | <b>July</b> | n/a | 1389 | 167  | 62   | 26   | 15   | 9   | 7   | 6   | 6   | 7   | 9   | 13   | 25   | 58   | 181  | 1389 | n/a |
|                                           | <b>Aug</b>  | --  | 4167 | 521  | 102  | 39   | 18   | 11  | 8   | 7   | 7   | 8   | 11  | 18   | 36   | 107  | 463  | 4167 | --  |
|                                           | <b>Sept</b> | --  | --   | 4167 | 347  | 85   | 34   | 18  | 13  | 11  | 10  | 12  | 17  | 31   | 77   | 298  | 4167 | --   | --  |
|                                           | <b>Oct</b>  | --  | --   | --   | 4167 | 321  | 104  | 50  | 30  | 24  | 23  | 28  | 44  | 85   | 321  | 4167 | --   | --   | --  |
|                                           | <b>Nov</b>  | --  | --   | --   | --   | 4167 | 463  | 174 | 91  | 69  | 71  | 89  | 154 | 417  | 4167 | --   | --   | --   | --  |
|                                           | <b>Dec</b>  | --  | --   | --   | --   | n/a  | 1042 | 321 | 160 | 119 | 119 | 167 | 298 | 1389 | n/a  | --   | --   | --   | --  |

**Table 2: Duration (in min) required to synthesize the standard vitamin D dose of 1000 IU with 1/8 of the body exposed to 1/2 of the minimal erythemal dose by site, time of day, and month in type II skinned individuals. Yellow areas represent periods when the ultraviolet index is above 3 and sun protection guidelines are recommended; green areas represent periods when the ultraviolet index is below 3 and duration is 30 min or less; orange areas represent periods when the ultraviolet index is below 3 and duration is between 31 and 60 min; and gray areas represent periods when the ultraviolet index is below 3 and duration is greater than 60 min.**

| City                                          | Month | Time of Day |      |      |      |      |      |     |     |     |     |     |     |      |      |      |      |      |     |
|-----------------------------------------------|-------|-------------|------|------|------|------|------|-----|-----|-----|-----|-----|-----|------|------|------|------|------|-----|
|                                               |       | 3           | 4    | 5    | 6    | 7    | 8    | 9   | 10  | 11  | 12  | 13  | 14  | 15   | 16   | 17   | 18   | 19   | 20  |
| Bedford/Dartmouth, NS<br>(44.7 N, 63.61 W)    | Jan   | --          | --   | --   | --   | 4167 | 641  | 231 | 132 | 105 | 107 | 137 | 245 | 641  | 2778 | --   | --   | --   | --  |
|                                               | Feb   | --          | --   | --   | 4167 | 926  | 260  | 116 | 72  | 57  | 57  | 72  | 119 | 269  | 1042 | 8333 | --   | --   | --  |
|                                               | Mar   | --          | --   | --   | 1389 | 309  | 116  | 59  | 39  | 33  | 34  | 42  | 62  | 116  | 321  | 1667 | 8333 | --   | --  |
|                                               | Apr   | --          | --   | 2083 | 463  | 149  | 63   | 38  | 27  | 24  | 24  | 28  | 39  | 67   | 152  | 490  | 2778 | --   | --  |
|                                               | May   | --          | 4167 | 833  | 219  | 87   | 44   | 27  | 21  | 17  | 18  | 21  | 28  | 44   | 83   | 208  | 833  | 4167 | --  |
|                                               | June  | --          | 2778 | 521  | 154  | 66   | 36   | 22  | 17  | 14  | 14  | 16  | 22  | 34   | 59   | 149  | 556  | 4167 | --  |
|                                               | July  | --          | 4167 | 641  | 163  | 68   | 35   | 21  | 16  | 14  | 14  | 16  | 21  | 33   | 59   | 152  | 595  | 4167 | --  |
|                                               | Aug   | --          | --   | 1190 | 287  | 93   | 43   | 26  | 19  | 16  | 16  | 19  | 25  | 41   | 88   | 260  | 1667 | 8333 | --  |
|                                               | Sept  | --          | --   | 2778 | 694  | 170  | 69   | 36  | 25  | 21  | 21  | 26  | 38  | 68   | 170  | 758  | 4167 | --   | --  |
|                                               | Oct   | --          | --   | --   | 2083 | 490  | 149  | 71  | 45  | 36  | 38  | 46  | 73  | 146  | 521  | 2778 | --   | --   | --  |
|                                               | Nov   | --          | --   | --   | --   | 1389 | 439  | 160 | 97  | 76  | 78  | 102 | 170 | 439  | 2083 | --   | --   | --   | --  |
|                                               | Dec   | --          | --   | --   | --   | 4167 | 926  | 309 | 160 | 124 | 128 | 170 | 321 | 1042 | 4167 | --   | --   | --   | --  |
| Goose Bay, Newfoundland<br>(53.32 N, 60.36 W) | Jan   | --          | --   | --   | --   | 8333 | 1667 | 521 | 245 | 185 | 189 | 245 | 463 | 1389 | n/a  | --   | --   | --   | --  |
|                                               | Feb   | --          | --   | --   | 8333 | 1667 | 439  | 170 | 108 | 86  | 87  | 108 | 170 | 417  | 1667 | n/a  | --   | --   | --  |
|                                               | Mar   | --          | --   | 8333 | 1389 | 379  | 128  | 72  | 49  | 41  | 41  | 48  | 69  | 130  | 362  | 1389 | n/a  | --   | --  |
|                                               | Apr   | --          | --   | 694  | 347  | 121  | 62   | 39  | 29  | 25  | 25  | 28  | 38  | 60   | 121  | 278  | --   | --   | --  |
|                                               | May   | --          | --   | 595  | 177  | 91   | 49   | 33  | 25  | 22  | 22  | 24  | 31  | 47   | 86   | 194  | 417  | --   | --  |
|                                               | June  | --          | --   | 379  | 139  | 69   | 41   | 28  | 22  | 21  | 20  | 23  | 29  | 42   | 65   | 124  | 321  | --   | --  |
|                                               | July  | --          | --   | 521  | 160  | 79   | 45   | 30  | 24  | 21  | 22  | 25  | 32  | 48   | 78   | 167  | 397  | --   | --  |
|                                               | Aug   | --          | --   | 556  | 253  | 104  | 51   | 33  | 25  | 23  | 23  | 27  | 36  | 54   | 111  | 278  | --   | --   | --  |
|                                               | Sept  | --          | --   | 8333 | 833  | 260  | 103  | 60  | 43  | 36  | 36  | 43  | 59  | 110  | 269  | 833  | n/a  | --   | --  |
|                                               | Oct   | --          | --   | --   | 8333 | 1042 | 321  | 130 | 90  | 74  | 75  | 92  | 139 | 347  | 1042 | 8333 | --   | --   | --  |
|                                               | Nov   | --          | --   | --   | --   | 8333 | 926  | 379 | 194 | 154 | 157 | 198 | 379 | 1042 | 8333 | --   | --   | --   | --  |
|                                               | Dec   | --          | --   | --   | --   | --   | 8333 | 758 | 321 | 260 | 269 | 362 | 694 | 2778 | --   | --   | --   | --   | --  |
| Montreal/Dorval, Quebec<br>(45.48 N, 73.75 W) | Jan   | --          | --   | --   | --   | --   | 521  | 194 | 110 | 86  | 87  | 114 | 203 | 556  | 4167 | n/a  | --   | --   | --  |
|                                               | Feb   | --          | --   | --   | --   | 641  | 214  | 95  | 59  | 47  | 48  | 60  | 97  | 214  | 926  | 8333 | --   | --   | --  |
|                                               | Mar   | --          | --   | --   | 758  | 238  | 93   | 48  | 33  | 28  | 28  | 34  | 52  | 93   | 253  | 1667 | n/a  | --   | --  |
|                                               | Apr   | --          | --   | 1042 | 379  | 132  | 57   | 34  | 25  | 21  | 21  | 25  | 34  | 59   | 128  | 397  | 4167 | n/a  | --  |
|                                               | May   | --          | --   | 641  | 181  | 71   | 38   | 24  | 19  | 16  | 17  | 19  | 26  | 39   | 76   | 219  | 833  | 8333 | --  |
|                                               | June  | --          | --   | 439  | 139  | 60   | 32   | 20  | 16  | 14  | 14  | 16  | 21  | 31   | 57   | 152  | 463  | 4167 | n/a |
|                                               | July  | --          | --   | 463  | 141  | 58   | 32   | 20  | 16  | 14  | 14  | 16  | 22  | 33   | 60   | 163  | 556  | 8333 | n/a |
|                                               | Aug   | --          | --   | 833  | 231  | 83   | 38   | 23  | 17  | 15  | 15  | 18  | 25  | 41   | 79   | 253  | 1667 | n/a  | --  |
|                                               | Sept  | --          | --   | --   | 595  | 170  | 68   | 35  | 26  | 22  | 23  | 27  | 40  | 70   | 198  | 833  | 8333 | --   | --  |
|                                               | Oct   | --          | --   | --   | 1667 | 490  | 157  | 74  | 48  | 39  | 40  | 50  | 76  | 167  | 595  | 8333 | --   | --   | --  |
|                                               | Nov   | --          | --   | --   | --   | 833  | 463  | 185 | 107 | 86  | 86  | 110 | 194 | 521  | 4167 | n/a  | --   | --   | --  |

|                                                          |             |      |      |      |      |      |      |      |     |     |     |     |      |      |      |      |      |      |      |
|----------------------------------------------------------|-------------|------|------|------|------|------|------|------|-----|-----|-----|-----|------|------|------|------|------|------|------|
|                                                          | <b>Dec</b>  | --   | --   | --   | --   | --   | 694  | 287  | 154 | 116 | 119 | 157 | 298  | 926  | 8333 | --   | --   | --   | --   |
| <b>Toronto/Downsview, Ontario<br/>(43.78 N, 79.47 W)</b> | <b>Jan</b>  | --   | --   | --   | --   | 4167 | 595  | 208  | 116 | 88  | 90  | 117 | 208  | 595  | 4167 | --   | --   | --   | --   |
|                                                          | <b>Feb</b>  | --   | --   | --   | 8333 | 926  | 225  | 97   | 60  | 49  | 49  | 63  | 103  | 238  | 926  | 8333 | --   | --   | --   |
|                                                          | <b>Mar</b>  | --   | --   | 8333 | 1667 | 298  | 99   | 52   | 35  | 30  | 30  | 37  | 55   | 105  | 287  | 1667 | 8333 | --   | --   |
|                                                          | <b>Apr</b>  | --   | n/a  | 2778 | 439  | 134  | 58   | 35   | 25  | 21  | 21  | 25  | 35   | 59   | 128  | 439  | 4167 | --   | --   |
|                                                          | <b>May</b>  | --   | 8333 | 833  | 185  | 68   | 35   | 23   | 17  | 15  | 16  | 19  | 26   | 40   | 72   | 203  | 833  | 8333 | --   |
|                                                          | <b>June</b> | --   | 8333 | 521  | 144  | 58   | 30   | 19   | 15  | 13  | 14  | 16  | 21   | 33   | 60   | 160  | 556  | 8333 | n/a  |
|                                                          | <b>July</b> | --   | 8333 | 521  | 137  | 54   | 29   | 19   | 14  | 13  | 13  | 15  | 21   | 33   | 60   | 163  | 556  | 8333 | --   |
|                                                          | <b>Aug</b>  | --   | 8333 | 1667 | 245  | 79   | 37   | 22   | 17  | 15  | 15  | 18  | 24   | 39   | 79   | 269  | 1667 | 8333 | --   |
|                                                          | <b>Sept</b> | --   | --   | 8333 | 694  | 160  | 60   | 33   | 23  | 20  | 20  | 24  | 35   | 63   | 167  | 758  | 8333 | --   | --   |
|                                                          | <b>Oct</b>  | --   | --   | --   | 4167 | 490  | 144  | 66   | 43  | 35  | 35  | 44  | 68   | 154  | 556  | 4167 | --   | --   | --   |
|                                                          | <b>Nov</b>  | --   | --   | --   | n/a  | 2778 | 439  | 152  | 93  | 72  | 75  | 98  | 170  | 463  | 2778 | n/a  | --   | --   | --   |
|                                                          | <b>Dec</b>  | --   | --   | --   | --   | 8333 | 926  | 287  | 141 | 107 | 108 | 149 | 321  | 926  | 8333 | --   | --   | --   | --   |
| <b>Winnipeg, Manitoba<br/>(49.9 N, 97.24 W)</b>          | <b>Jan</b>  | --   | --   | --   | --   | 4167 | 833  | 245  | 134 | 105 | 103 | 128 | 219  | 833  | 8333 | --   | --   | --   | --   |
|                                                          | <b>Feb</b>  | --   | --   | --   | 8333 | 1389 | 253  | 114  | 72  | 57  | 57  | 71  | 113  | 245  | 1389 | 8333 | --   | --   | --   |
|                                                          | <b>Mar</b>  | --   | --   | 8333 | 1389 | 260  | 105  | 57   | 38  | 32  | 32  | 39  | 57   | 107  | 269  | 1667 | 8333 | --   | --   |
|                                                          | <b>Apr</b>  | --   | 8333 | 1667 | 347  | 121  | 57   | 34   | 25  | 22  | 22  | 25  | 35   | 59   | 124  | 321  | 2083 | 8333 | --   |
|                                                          | <b>May</b>  | --   | 4167 | 595  | 163  | 71   | 38   | 26   | 21  | 18  | 18  | 21  | 27   | 42   | 76   | 177  | 463  | 4167 | --   |
|                                                          | <b>June</b> | 8333 | 2083 | 362  | 130  | 59   | 33   | 22   | 17  | 16  | 16  | 19  | 25   | 36   | 63   | 134  | 333  | 1667 | 8333 |
|                                                          | <b>July</b> | --   | 2778 | 379  | 128  | 56   | 30   | 21   | 16  | 15  | 15  | 17  | 22   | 34   | 62   | 144  | 347  | 2778 | --   |
|                                                          | <b>Aug</b>  | --   | 8333 | 1042 | 189  | 80   | 39   | 25   | 19  | 16  | 17  | 19  | 27   | 43   | 83   | 219  | 1042 | 8333 | --   |
|                                                          | <b>Sept</b> | --   | --   | 4167 | 758  | 154  | 72   | 40   | 28  | 25  | 25  | 30  | 45   | 79   | 181  | 758  | 8333 | --   | --   |
|                                                          | <b>Oct</b>  | --   | --   | --   | 4167 | 758  | 177  | 95   | 60  | 50  | 50  | 62  | 98   | 203  | 694  | 8333 | --   | --   | --   |
|                                                          | <b>Nov</b>  | --   | --   | --   | --   | 4167 | 694  | 203  | 126 | 94  | 97  | 121 | 208  | 694  | 8333 | --   | --   | --   | --   |
|                                                          | <b>Dec</b>  | --   | --   | --   | --   | 8333 | 1667 | 417  | 208 | 154 | 152 | 208 | 379  | 1389 | 8333 | --   | --   | --   | --   |
| <b>Churchill, Manitoba<br/>(58.75 N, 94.07 W)</b>        | <b>Jan</b>  | --   | --   | --   | --   | 4167 | 833  | 417  | 321 | 321 | 439 | 926 | 4167 | --   | --   | --   | --   | --   |      |
|                                                          | <b>Feb</b>  | --   | --   | --   | --   | 4167 | 490  | 260  | 137 | 114 | 114 | 144 | 231  | 490  | 4167 | --   | --   | --   | --   |
|                                                          | <b>Mar</b>  | --   | --   | 4167 | 1042 | 298  | 132  | 69   | 51  | 43  | 42  | 50  | 71   | 130  | 287  | 1190 | 8333 | --   | --   |
|                                                          | <b>Apr</b>  | --   | 8333 | 833  | 260  | 100  | 57   | 35   | 27  | 23  | 24  | 27  | 35   | 54   | 103  | 253  | 1190 | 8333 | --   |
|                                                          | <b>May</b>  | 8333 | 1190 | 397  | 139  | 72   | 40   | 29   | 23  | 20  | 20  | 22  | 28   | 40   | 69   | 134  | 347  | 1389 | 8333 |
|                                                          | <b>June</b> | 2778 | 595  | 208  | 108  | 64   | 38   | 27   | 22  | 20  | 20  | 22  | 26   | 37   | 60   | 103  | 253  | 926  | 2778 |
|                                                          | <b>July</b> | 8333 | 758  | 298  | 124  | 70   | 39   | 27   | 22  | 20  | 20  | 22  | 28   | 39   | 65   | 119  | 298  | 1042 | 8333 |
|                                                          | <b>Aug</b>  | --   | 4167 | 694  | 238  | 105  | 60   | 38   | 30  | 27  | 27  | 30  | 40   | 62   | 111  | 253  | 694  | 4167 | --   |
|                                                          | <b>Sept</b> | --   | --   | 4167 | 758  | 298  | 141  | 83   | 56  | 50  | 48  | 57  | 81   | 139  | 298  | 926  | 8333 | --   | --   |
|                                                          | <b>Oct</b>  | --   | --   | --   | 8333 | 2083 | 439  | 219  | 132 | 110 | 113 | 139 | 219  | 439  | 2083 | 4167 | --   | --   | --   |
|                                                          | <b>Nov</b>  | --   | --   | --   | --   | 8333 | 2778 | 595  | 321 | 245 | 245 | 321 | 641  | 2778 | 8333 | --   | --   | --   | --   |
|                                                          | <b>Dec</b>  | --   | --   | --   | --   | --   | 8333 | 2083 | 758 | 521 | 521 | 758 | 1667 | 8333 | --   | --   | --   | --   | --   |





|                                                            |      |    |     |      |     |     |     |     |     |     |     |     |     |     |     |     |     |    |    |    |    |    |
|------------------------------------------------------------|------|----|-----|------|-----|-----|-----|-----|-----|-----|-----|-----|-----|-----|-----|-----|-----|----|----|----|----|----|
| Bratts Lake (Regina), Saskatchewan<br>(50.205 N 104.705 W) | Jan  | -- | --  | --   | --  | --  | 463 | 208 | 116 | 88  | 91  | 119 | 214 | 521 | --  | --  | --  | -- | -- |    |    |    |
|                                                            | Feb  | -- | --  | --   | --  | 521 | 219 | 102 | 61  | 49  | 51  | 64  | 104 | 238 | 595 | --  | --  | -- | -- | -- |    |    |
|                                                            | Mar  | -- | --  | --   | 641 | 238 | 88  | 47  | 32  | 28  | 27  | 32  | 48  | 88  | 238 | 556 | --  | -- | -- | -- | -- |    |
|                                                            | Apr  | -- | --  | 8333 | 321 | 114 | 54  | 33  | 24  | 21  | 22  | 25  | 35  | 56  | 114 | 347 | 833 | -- | -- | -- | -- | -- |
|                                                            | May  | -- | --  | 439  | 160 | 68  | 35  | 25  | 19  | 17  | 17  | 20  | 25  | 39  | 70  | 167 | 490 | -- | -- | -- | -- | -- |
|                                                            | June | -- | 926 | 362  | 126 | 57  | 32  | 23  | 17  | 16  | 16  | 18  | 24  | 33  | 57  | 121 | 397 | -- | -- | -- | -- | -- |
|                                                            | July | -- | --  | 347  | 113 | 51  | 28  | 19  | 14  | 13  | 14  | 16  | 20  | 29  | 52  | 119 | 379 | -- | -- | -- | -- | -- |
|                                                            | Aug  | -- | --  | 641  | 203 | 77  | 38  | 24  | 18  | 15  | 15  | 17  | 24  | 38  | 74  | 208 | 556 | -- | -- | -- | -- | -- |
|                                                            | Sept | -- | --  | --   | 490 | 167 | 71  | 41  | 27  | 23  | 24  | 27  | 39  | 67  | 170 | 463 | --  | -- | -- | -- | -- |    |
|                                                            | Oct  | -- | --  | --   | --  | 490 | 194 | 90  | 57  | 47  | 48  | 58  | 94  | 203 | 439 | --  | --  | -- | -- | -- |    |    |
|                                                            | Nov  | -- | --  | --   | --  | --  | 521 | 208 | 119 | 92  | 92  | 116 | 208 | 417 | --  | --  | --  | -- | -- |    |    |    |
|                                                            | Dec  | -- | --  | --   | --  | --  | --  | 333 | 181 | 141 | 144 | 189 | 347 | 833 | --  | --  | --  | -- | -- |    |    |    |

|                                                |      |    |    |     |     |     |      |     |     |     |     |     |     |      |      |     |     |    |    |    |    |    |
|------------------------------------------------|------|----|----|-----|-----|-----|------|-----|-----|-----|-----|-----|-----|------|------|-----|-----|----|----|----|----|----|
| Saskatoon, Saskatchewan<br>(52.11 N, 106.71 W) | Jan  | -- | -- | --  | --  | --  | 926  | 298 | 167 | 126 | 128 | 167 | 260 | 1042 | --   | --  | --  | -- | -- |    |    |    |
|                                                | Feb  | -- | -- | --  | --  | --  | 278  | 126 | 81  | 63  | 64  | 78  | 128 | 238  | 1042 | --  | --  | -- | -- | -- |    |    |
|                                                | Mar  | -- | -- | --  | 463 | 287 | 114  | 60  | 41  | 35  | 34  | 43  | 65  | 123  | 269  | --  | --  | -- | -- | -- |    |    |
|                                                | Apr  | -- | -- | --  | 362 | 132 | 63   | 38  | 28  | 25  | 23  | 29  | 38  | 64   | 139  | 347 | --  | -- | -- | -- | -- |    |
|                                                | May  | -- | -- | 439 | 170 | 69  | 38   | 26  | 21  | 18  | 19  | 21  | 27  | 41   | 77   | 163 | 379 | -- | -- | -- | -- | -- |
|                                                | June | -- | -- | 333 | 111 | 55  | 33   | 23  | 18  | 16  | 16  | 19  | 23  | 38   | 56   | 128 | 321 | -- | -- | -- | -- | -- |
|                                                | July | -- | -- | 347 | 111 | 51  | 31   | 21  | 17  | 15  | 15  | 17  | 22  | 34   | 61   | 123 | 321 | -- | -- | -- | -- | -- |
|                                                | Aug  | -- | -- | 439 | 245 | 76  | 39   | 25  | 19  | 17  | 17  | 20  | 27  | 38   | 92   | 238 | 347 | -- | -- | -- | -- | -- |
|                                                | Sept | -- | -- | --  | 362 | 225 | 74   | 41  | 30  | 24  | 26  | 29  | 45  | 86   | 208  | 333 | --  | -- | -- | -- | -- |    |
|                                                | Oct  | -- | -- | --  | --  | 362 | 253  | 104 | 66  | 53  | 53  | 70  | 105 | 225  | 362  | --  | --  | -- | -- | -- |    |    |
|                                                | Nov  | -- | -- | --  | --  | --  | 490  | 309 | 163 | 121 | 126 | 167 | 260 | 926  | --   | --  | --  | -- | -- |    |    |    |
|                                                | Dec  | -- | -- | --  | --  | --  | 1667 | 463 | 269 | 185 | 181 | 225 | 490 | 1667 | --   | --  | --  | -- | -- |    |    |    |

|                                            |      |     |      |      |      |      |      |     |     |     |     |     |     |      |      |      |      |      |    |    |    |    |    |
|--------------------------------------------|------|-----|------|------|------|------|------|-----|-----|-----|-----|-----|-----|------|------|------|------|------|----|----|----|----|----|
| Stony Plain, Alberta<br>(53.55 N, 114.1 W) | Jan  | --  | --   | --   | --   | 8333 | 1389 | 439 | 214 | 163 | 163 | 225 | 417 | 1389 | n/a  | --   | --   | --   | -- |    |    |    |    |
|                                            | Feb  | --  | --   | --   | 8333 | 1667 | 397  | 154 | 97  | 77  | 76  | 98  | 160 | 362  | 1667 | n/a  | --   | --   | -- | -- |    |    |    |
|                                            | Mar  | --  | --   | 8333 | 1190 | 347  | 116  | 65  | 44  | 36  | 36  | 44  | 65  | 123  | 321  | 1389 | n/a  | --   | -- | -- | -- |    |    |
|                                            | Apr  | --  | n/a  | 1667 | 439  | 108  | 58   | 38  | 28  | 25  | 25  | 30  | 40  | 65   | 130  | 362  | 1389 | --   | -- | -- | -- | -- |    |
|                                            | May  | n/a | 2778 | 521  | 121  | 72   | 41   | 28  | 23  | 20  | 21  | 23  | 31  | 47   | 74   | 170  | 490  | 1667 | -- | -- | -- | -- | -- |
|                                            | June | n/a | 2083 | 521  | 107  | 55   | 36   | 24  | 19  | 18  | 17  | 19  | 25  | 37   | 65   | 134  | 333  | 1389 | -- | -- | -- | -- | -- |
|                                            | July | n/a | 1667 | 417  | 99   | 54   | 33   | 21  | 17  | 15  | 15  | 17  | 22  | 34   | 57   | 128  | 379  | 1667 | -- | -- | -- | -- | -- |
|                                            | Aug  | --  | 8333 | 833  | 269  | 78   | 39   | 28  | 20  | 18  | 18  | 21  | 28  | 43   | 93   | 231  | 833  | --   | -- | -- | -- | -- |    |
|                                            | Sept | --  | --   | 8333 | 641  | 225  | 82   | 47  | 33  | 27  | 28  | 34  | 49  | 85   | 231  | 694  | 8333 | --   | -- | -- | -- | -- |    |
|                                            | Oct  | --  | --   | --   | 8333 | 758  | 287  | 113 | 75  | 60  | 60  | 76  | 113 | 278  | 833  | 8333 | --   | --   | -- | -- | -- |    |    |
|                                            | Nov  | --  | --   | --   | --   | 8333 | 833  | 362 | 181 | 139 | 139 | 181 | 347 | 1042 | 8333 | --   | --   | --   | -- | -- |    |    |    |
|                                            | Dec  | --  | --   | --   | --   | --   | 8333 | 694 | 321 | 245 | 245 | 347 | 694 | 2778 | n/a  | --   | --   | --   | -- |    |    |    |    |

Saturna Island, BC  
(48.78 N, 123.13 W)

|             |     |      |      |      |      |      |     |     |     |     |     |     |      |      |      |      |      |     |
|-------------|-----|------|------|------|------|------|-----|-----|-----|-----|-----|-----|------|------|------|------|------|-----|
| <b>Jan</b>  | --  | --   | --   | --   | 8333 | 1389 | 439 | 245 | 185 | 181 | 238 | 439 | 1389 | 8333 | --   | --   | --   | --  |
| <b>Feb</b>  | --  | --   | --   | 8333 | 1667 | 417  | 189 | 113 | 91  | 87  | 103 | 167 | 397  | 1667 | n/a  | --   | --   | --  |
| <b>Mar</b>  | --  | --   | 8333 | 2083 | 397  | 149  | 79  | 53  | 44  | 44  | 53  | 75  | 139  | 379  | 1667 | n/a  | --   | --  |
| <b>Apr</b>  | --  | n/a  | 2778 | 397  | 130  | 60   | 36  | 26  | 23  | 22  | 26  | 35  | 59   | 126  | 397  | 2778 | n/a  | --  |
| <b>May</b>  | --  | 8333 | 595  | 194  | 79   | 42   | 26  | 19  | 17  | 17  | 19  | 25  | 38   | 71   | 167  | 521  | 4167 | n/a |
| <b>June</b> | n/a | 2083 | 347  | 126  | 55   | 33   | 21  | 16  | 14  | 14  | 16  | 21  | 30   | 54   | 126  | 397  | 2778 | n/a |
| <b>July</b> | n/a | 2778 | 333  | 124  | 53   | 29   | 19  | 14  | 12  | 12  | 14  | 18  | 27   | 49   | 116  | 362  | 2778 | n/a |
| <b>Aug</b>  | --  | 8333 | 1042 | 203  | 79   | 37   | 23  | 16  | 14  | 14  | 16  | 22  | 36   | 72   | 214  | 926  | 8333 | --  |
| <b>Sept</b> | --  | --   | 8333 | 694  | 170  | 68   | 36  | 25  | 21  | 21  | 24  | 35  | 62   | 154  | 595  | 8333 | --   | --  |
| <b>Oct</b>  | --  | --   | --   | 8333 | 641  | 208  | 100 | 60  | 48  | 46  | 57  | 88  | 170  | 641  | 8333 | --   | --   | --  |
| <b>Nov</b>  | --  | --   | --   | --   | 8333 | 926  | 347 | 181 | 139 | 141 | 177 | 309 | 833  | 8333 | --   | --   | --   | --  |
| <b>Dec</b>  | --  | --   | --   | --   | n/a  | 2083 | 641 | 321 | 238 | 238 | 333 | 595 | 2778 | n/a  | --   | --   | --   | --  |

**Table 3: Duration (in min) required to synthesize the standard vitamin D dose (SDD) of 1000 IU with 1/4 of the body exposed to 1/4 of the minimal erythral dose (MED) by site, time of day, and month in type V skinned individuals. Yellow areas represent periods when the ultraviolet index (UVI) is above 3 and sun protection guidelines are recommended; orange areas represent periods when UVI is below 3 and duration is between 31 and 60 min; and gray areas represent periods when UVI is below 3 and duration is greater than 60 min. There are no opportunities to synthesize enough vitamin D in less than 30 min when the UVI is below 3.**

| City                                          | Month | Time of Day |      |       |       |       |       |     |     |     |     |     |     |      |       |       |       |       |     |
|-----------------------------------------------|-------|-------------|------|-------|-------|-------|-------|-----|-----|-----|-----|-----|-----|------|-------|-------|-------|-------|-----|
|                                               |       | 3           | 4    | 5     | 6     | 7     | 8     | 9   | 10  | 11  | 12  | 13  | 14  | 15   | 16    | 17    | 18    | 19    | 20  |
| Bedford/Dartmouth, NS<br>(44.7 N, 63.61 W)    | Jan   | --          | --   | --    | --    | 5000  | 769   | 278 | 159 | 127 | 128 | 164 | 294 | 769  | 3333  | --    | --    | --    | --  |
|                                               | Feb   | --          | --   | --    | 5000  | 1111  | 313   | 139 | 86  | 68  | 68  | 86  | 143 | 323  | 1250  | 10000 | --    | --    | --  |
|                                               | Mar   | --          | --   | --    | 1667  | 370   | 139   | 70  | 47  | 40  | 41  | 51  | 75  | 139  | 385   | 2000  | 10000 | --    | --  |
|                                               | Apr   | --          | --   | 2500  | 556   | 179   | 75    | 46  | 32  | 28  | 29  | 33  | 47  | 80   | 182   | 588   | 3333  | --    | --  |
|                                               | May   | --          | 5000 | 1000  | 263   | 104   | 52    | 32  | 25  | 21  | 21  | 25  | 34  | 53   | 99    | 250   | 1000  | 5000  | --  |
|                                               | June  | --          | 3333 | 625   | 185   | 79    | 43    | 26  | 20  | 17  | 17  | 20  | 26  | 41   | 71    | 179   | 667   | 5000  | --  |
|                                               | July  | --          | 5000 | 769   | 196   | 81    | 42    | 26  | 19  | 17  | 17  | 19  | 26  | 40   | 70    | 182   | 714   | 5000  | --  |
|                                               | Aug   | --          | --   | 1429  | 345   | 111   | 52    | 31  | 22  | 19  | 19  | 22  | 30  | 50   | 105   | 313   | 2000  | 10000 | --  |
|                                               | Sept  | --          | --   | 3333  | 833   | 204   | 83    | 43  | 30  | 26  | 26  | 31  | 46  | 82   | 204   | 909   | 5000  | --    | --  |
|                                               | Oct   | --          | --   | --    | 2500  | 588   | 179   | 85  | 54  | 43  | 45  | 55  | 88  | 175  | 625   | 3333  | --    | --    | --  |
|                                               | Nov   | --          | --   | --    | --    | 1667  | 526   | 192 | 116 | 91  | 93  | 122 | 204 | 526  | 2500  | --    | --    | --    | --  |
|                                               | Dec   | --          | --   | --    | --    | 5000  | 1111  | 370 | 192 | 149 | 154 | 204 | 385 | 1250 | 5000  | --    | --    | --    | --  |
| Goose Bay, Newfoundland<br>(53.32 N, 60.36 W) | Jan   | --          | --   | --    | --    | 10000 | 2000  | 625 | 294 | 222 | 227 | 294 | 556 | 1667 | n/a   | --    | --    | --    | --  |
|                                               | Feb   | --          | --   | --    | 10000 | 2000  | 526   | 204 | 130 | 103 | 104 | 130 | 204 | 500  | 2000  | n/a   | --    | --    | --  |
|                                               | Mar   | --          | --   | 10000 | 1667  | 455   | 154   | 86  | 59  | 50  | 50  | 58  | 83  | 156  | 435   | 1667  | n/a   | --    | --  |
|                                               | Apr   | --          | --   | 833   | 417   | 145   | 74    | 47  | 34  | 30  | 29  | 34  | 46  | 72   | 145   | 333   | --    | --    | --  |
|                                               | May   | --          | --   | 714   | 213   | 109   | 59    | 40  | 29  | 26  | 26  | 29  | 38  | 56   | 103   | 233   | 500   | --    | --  |
|                                               | June  | --          | --   | 455   | 167   | 83    | 50    | 33  | 27  | 25  | 24  | 28  | 35  | 51   | 78    | 149   | 385   | --    | --  |
|                                               | July  | --          | --   | 625   | 192   | 94    | 54    | 36  | 29  | 26  | 27  | 30  | 39  | 57   | 93    | 200   | 476   | --    | --  |
|                                               | Aug   | --          | --   | 667   | 303   | 125   | 62    | 40  | 30  | 27  | 28  | 32  | 43  | 65   | 133   | 333   | --    | --    | --  |
|                                               | Sept  | --          | --   | 10000 | 1000  | 313   | 123   | 72  | 51  | 43  | 43  | 52  | 71  | 132  | 323   | 1000  | n/a   | --    | --  |
|                                               | Oct   | --          | --   | --    | 10000 | 1250  | 385   | 156 | 108 | 89  | 90  | 110 | 167 | 417  | 1250  | 10000 | --    | --    | --  |
|                                               | Nov   | --          | --   | --    | --    | 10000 | 1111  | 455 | 233 | 185 | 189 | 238 | 455 | 1250 | 10000 | --    | --    | --    | --  |
|                                               | Dec   | --          | --   | --    | --    | --    | 10000 | 909 | 385 | 313 | 323 | 435 | 833 | 3333 | --    | --    | --    | --    | --  |
| Montreal/Dorval, Quebec<br>(45.48 N, 73.75 W) | Jan   | --          | --   | --    | --    | --    | 625   | 233 | 132 | 103 | 104 | 137 | 244 | 667  | 5000  | n/a   | --    | --    | --  |
|                                               | Feb   | --          | --   | --    | --    | 321   | 256   | 114 | 71  | 57  | 57  | 72  | 116 | 256  | 1111  | 10000 | --    | --    | --  |
|                                               | Mar   | --          | --   | --    | 909   | 286   | 111   | 57  | 40  | 33  | 34  | 41  | 62  | 111  | 303   | 2000  | n/a   | --    | --  |
|                                               | Apr   | --          | --   | 1250  | 455   | 159   | 68    | 41  | 30  | 26  | 26  | 30  | 41  | 70   | 154   | 476   | 5000  | n/a   | --  |
|                                               | May   | --          | --   | 769   | 217   | 85    | 46    | 29  | 23  | 20  | 20  | 23  | 31  | 47   | 91    | 263   | 1000  | 10000 | --  |
|                                               | June  | --          | --   | 526   | 167   | 72    | 38    | 24  | 19  | 17  | 17  | 20  | 26  | 37   | 69    | 182   | 556   | 5000  | n/a |
|                                               | July  | --          | --   | 556   | 169   | 70    | 38    | 24  | 19  | 17  | 17  | 19  | 26  | 39   | 72    | 196   | 667   | 10000 | n/a |
|                                               | Aug   | --          | --   | 1000  | 278   | 99    | 45    | 28  | 21  | 18  | 18  | 22  | 29  | 49   | 95    | 303   | 2000  | n/a   | --  |
|                                               | Sept  | --          | --   | --    | 714   | 204   | 81    | 43  | 31  | 27  | 27  | 33  | 48  | 84   | 238   | 1000  | 10000 | --    | --  |
|                                               | Oct   | --          | --   | --    | 2000  | 588   | 189   | 89  | 57  | 47  | 48  | 60  | 92  | 200  | 714   | 10000 | --    | --    | --  |

|                                                  |      |       |       |       |       |       |       |      |     |     |     |     |      |       |       |       |       |       |       |
|--------------------------------------------------|------|-------|-------|-------|-------|-------|-------|------|-----|-----|-----|-----|------|-------|-------|-------|-------|-------|-------|
|                                                  | Nov  | --    | --    | --    | --    | 1000  | 556   | 222  | 128 | 103 | 103 | 132 | 233  | 625   | 5000  | n/a   | --    | --    | --    |
|                                                  | Dec  | --    | --    | --    | --    | --    | 833   | 345  | 185 | 139 | 143 | 189 | 357  | 1111  | 10000 | --    | --    | --    | --    |
| Toronto/Downsview, Ontario<br>(43.78 N, 79.47 W) | Jan  | --    | --    | --    | --    | 5000  | 714   | 250  | 139 | 105 | 108 | 141 | 250  | 714   | 5000  | --    | --    | --    | --    |
|                                                  | Feb  | --    | --    | --    | 10000 | 1111  | 270   | 116  | 72  | 58  | 59  | 75  | 123  | 286   | 1111  | 4167  | --    | --    | --    |
|                                                  | Mar  | --    | --    | 10000 | 2000  | 357   | 119   | 63   | 42  | 36  | 36  | 45  | 66   | 127   | 345   | 2000  | 10000 | --    | --    |
|                                                  | Apr  | --    | n/a   | 3333  | 526   | 161   | 69    | 41   | 30  | 25  | 25  | 30  | 42   | 71    | 154   | 526   | 5000  | --    | --    |
|                                                  | May  | --    | 10000 | 1000  | 222   | 81    | 43    | 27   | 21  | 18  | 19  | 23  | 31   | 48    | 86    | 244   | 1000  | 10000 | --    |
|                                                  | June | --    | 10000 | 625   | 172   | 70    | 36    | 23   | 18  | 16  | 17  | 19  | 26   | 40    | 71    | 192   | 667   | 10000 | n/a   |
|                                                  | July | --    | 10000 | 625   | 164   | 65    | 34    | 22   | 17  | 16  | 16  | 18  | 25   | 39    | 72    | 196   | 667   | 10000 | --    |
|                                                  | Aug  | --    | 10000 | 2000  | 294   | 94    | 44    | 27   | 21  | 18  | 18  | 21  | 29   | 47    | 94    | 323   | 2000  | 10000 | --    |
|                                                  | Sept | --    | --    | 10000 | 833   | 192   | 72    | 40   | 28  | 24  | 25  | 29  | 43   | 76    | 200   | 909   | 10000 | --    | --    |
|                                                  | Oct  | --    | --    | --    | 5000  | 588   | 172   | 79   | 51  | 42  | 42  | 53  | 81   | 185   | 667   | 5000  | --    | --    | --    |
|                                                  | Nov  | --    | --    | --    | n/a   | 3333  | 526   | 182  | 111 | 86  | 90  | 118 | 204  | 556   | 3333  | n/a   | --    | --    | --    |
|                                                  | Dec  | --    | --    | --    | --    | 10000 | 1111  | 345  | 169 | 128 | 130 | 179 | 385  | 1111  | 10000 | --    | --    | --    | --    |
| Winnipeg, Manitoba<br>(49.9 N, 97.24 W)          | Jan  | --    | --    | --    | --    | 5000  | 1000  | 294  | 161 | 127 | 123 | 154 | 263  | 1000  | 10000 | --    | --    | --    | --    |
|                                                  | Feb  | --    | --    | --    | 10000 | 1667  | 303   | 137  | 86  | 69  | 68  | 85  | 135  | 294   | 1667  | 10000 | --    | --    | --    |
|                                                  | Mar  | --    | --    | 10000 | 1667  | 313   | 127   | 68   | 46  | 38  | 38  | 46  | 68   | 128   | 323   | 2000  | 10000 | --    | --    |
|                                                  | Apr  | --    | 10000 | 2000  | 417   | 145   | 69    | 41   | 30  | 26  | 27  | 30  | 42   | 71    | 149   | 385   | 2500  | 10000 | --    |
|                                                  | May  | --    | 5000  | 714   | 196   | 85    | 46    | 31   | 25  | 22  | 22  | 25  | 32   | 50    | 92    | 213   | 556   | 5000  | --    |
|                                                  | June | 10000 | 2500  | 435   | 156   | 70    | 39    | 26   | 21  | 19  | 19  | 23  | 30   | 43    | 75    | 161   | 400   | 2000  | 10000 |
|                                                  | July | --    | 3333  | 455   | 154   | 67    | 36    | 25   | 20  | 18  | 18  | 20  | 26   | 41    | 74    | 172   | 417   | 3333  | --    |
|                                                  | Aug  | --    | 10000 | 1250  | 227   | 96    | 47    | 30   | 22  | 20  | 20  | 23  | 32   | 52    | 100   | 263   | 1250  | 10000 | --    |
|                                                  | Sept | --    | --    | 5000  | 909   | 185   | 86    | 48   | 34  | 30  | 30  | 36  | 53   | 95    | 217   | 909   | 10000 | --    | --    |
|                                                  | Oct  | --    | --    | --    | 5000  | 909   | 213   | 114  | 72  | 60  | 60  | 74  | 118  | 244   | 833   | 10000 | --    | --    | --    |
|                                                  | Nov  | --    | --    | --    | --    | 5000  | 833   | 244  | 152 | 112 | 116 | 145 | 250  | 833   | 10000 | --    | --    | --    | --    |
|                                                  | Dec  | --    | --    | --    | --    | 10000 | 2000  | 500  | 250 | 185 | 182 | 250 | 455  | 1667  | 10000 | --    | --    | --    | --    |
| Churchill, Manitoba<br>(58.75 N, 94.07 W)        | Jan  | --    | --    | --    | --    | --    | 5000  | 1000 | 500 | 385 | 385 | 526 | 1111 | 5000  | --    | --    | --    | --    | --    |
|                                                  | Feb  | --    | --    | --    | --    | 5000  | 588   | 313  | 164 | 137 | 137 | 172 | 278  | 588   | 5000  | --    | --    | --    | --    |
|                                                  | Mar  | --    | --    | 5000  | 1250  | 357   | 159   | 83   | 61  | 51  | 51  | 60  | 85   | 156   | 345   | 1429  | 10000 | --    | --    |
|                                                  | Apr  | --    | 10000 | 1000  | 313   | 120   | 68    | 42   | 32  | 28  | 28  | 32  | 42   | 65    | 123   | 303   | 1429  | 10000 | --    |
|                                                  | May  | 10000 | 1429  | 476   | 167   | 86    | 48    | 34   | 27  | 24  | 24  | 27  | 33   | 49    | 83    | 161   | 417   | 1667  | 10000 |
|                                                  | June | 3333  | 714   | 250   | 130   | 76    | 46    | 33   | 26  | 23  | 23  | 26  | 31   | 44    | 72    | 123   | 303   | 1111  | 3333  |
|                                                  | July | 10000 | 909   | 357   | 149   | 84    | 47    | 33   | 26  | 24  | 24  | 27  | 33   | 47    | 78    | 143   | 357   | 1250  | 10000 |
|                                                  | Aug  | --    | 5000  | 833   | 286   | 127   | 72    | 46   | 36  | 32  | 33  | 36  | 48   | 74    | 133   | 303   | 833   | 5000  | --    |
|                                                  | Sept | --    | --    | 5000  | 909   | 357   | 169   | 100  | 68  | 60  | 57  | 68  | 97   | 167   | 357   | 1111  | 10000 | --    | --    |
|                                                  | Oct  | --    | --    | --    | 10000 | 2500  | 526   | 263  | 159 | 132 | 135 | 167 | 263  | 526   | 2500  | 5000  | --    | --    | --    |
|                                                  | Nov  | --    | --    | --    | --    | 10000 | 3333  | 714  | 385 | 294 | 294 | 385 | 769  | 3333  | 10000 | --    | --    | --    | --    |
|                                                  | Dec  | --    | --    | --    | --    | --    | 10000 | 2500 | 909 | 625 | 625 | 909 | 2000 | 10000 | --    | --    | --    | --    | --    |



|                                                             |      |    |      |       |     |     |     |     |     |     |     |     |     |      |     |     |      |    |    |
|-------------------------------------------------------------|------|----|------|-------|-----|-----|-----|-----|-----|-----|-----|-----|-----|------|-----|-----|------|----|----|
| Bratts Lake (Regina), Saskatchewan<br>(50.205 N, 104.705 W) | Jan  | -- | --   | --    | --  | --  | 556 | 250 | 139 | 105 | 109 | 143 | 256 | 625  | --  | --  | --   | -- | -- |
|                                                             | Feb  | -- | --   | --    | --  | 625 | 263 | 122 | 74  | 58  | 61  | 76  | 125 | 286  | 714 | --  | --   | -- | -- |
|                                                             | Mar  | -- | --   | --    | 769 | 286 | 105 | 56  | 38  | 33  | 33  | 38  | 57  | 105  | 286 | 667 | --   | -- | -- |
|                                                             | Apr  | -- | --   | 10000 | 385 | 137 | 65  | 40  | 29  | 26  | 27  | 31  | 42  | 68   | 137 | 417 | 1000 | -- | -- |
|                                                             | May  | -- | --   | 526   | 192 | 81  | 42  | 30  | 22  | 20  | 21  | 23  | 30  | 47   | 84  | 200 | 588  | -- | -- |
|                                                             | June | -- | 1111 | 435   | 152 | 68  | 38  | 28  | 20  | 19  | 19  | 22  | 29  | 40   | 68  | 145 | 476  | -- | -- |
|                                                             | July | -- | --   | 417   | 135 | 61  | 34  | 23  | 17  | 16  | 16  | 19  | 23  | 35   | 62  | 143 | 455  | -- | -- |
|                                                             | Aug  | -- | --   | 769   | 244 | 93  | 45  | 29  | 21  | 18  | 18  | 21  | 28  | 45   | 88  | 250 | 667  | -- | -- |
|                                                             | Sept | -- | --   | --    | 588 | 200 | 85  | 49  | 33  | 28  | 28  | 33  | 47  | 81   | 204 | 556 | --   | -- | -- |
|                                                             | Oct  | -- | --   | --    | --  | 588 | 233 | 108 | 69  | 56  | 57  | 69  | 112 | 244  | 526 | --  | --   | -- | -- |
|                                                             | Nov  | -- | --   | --    | --  | --  | 625 | 250 | 143 | 110 | 110 | 139 | 250 | 500  | --  | --  | --   | -- | -- |
|                                                             | Dec  | -- | --   | --    | --  | --  | --  | 400 | 217 | 169 | 172 | 227 | 417 | 1000 | --  | --  | --   | -- | -- |

|                                                |      |    |    |     |     |     |      |     |     |     |     |     |     |      |      |     |     |    |    |
|------------------------------------------------|------|----|----|-----|-----|-----|------|-----|-----|-----|-----|-----|-----|------|------|-----|-----|----|----|
| Saskatoon, Saskatchewan<br>(52.11 N, 106.71 W) | Jan  | -- | -- | --  | --  | --  | 1111 | 357 | 200 | 152 | 154 | 200 | 313 | 1250 | --   | --  | --  | -- | -- |
|                                                | Feb  | -- | -- | --  | --  | --  | 333  | 152 | 97  | 75  | 76  | 93  | 154 | 286  | 1250 | --  | --  | -- | -- |
|                                                | Mar  | -- | -- | --  | 556 | 345 | 137  | 72  | 49  | 41  | 41  | 52  | 78  | 147  | 323  | --  | --  | -- | -- |
|                                                | Apr  | -- | -- | --  | 435 | 159 | 76   | 46  | 34  | 30  | 28  | 35  | 46  | 76   | 167  | 417 | --  | -- | -- |
|                                                | May  | -- | -- | 526 | 204 | 83  | 45   | 31  | 25  | 22  | 22  | 26  | 32  | 49   | 93   | 196 | 455 | -- | -- |
|                                                | June | -- | -- | 400 | 133 | 66  | 40   | 27  | 21  | 19  | 20  | 23  | 28  | 46   | 67   | 154 | 385 | -- | -- |
|                                                | July | -- | -- | 417 | 133 | 62  | 38   | 25  | 20  | 18  | 18  | 20  | 26  | 41   | 73   | 147 | 385 | -- | -- |
|                                                | Aug  | -- | -- | 526 | 294 | 92  | 47   | 30  | 23  | 21  | 20  | 24  | 33  | 46   | 110  | 286 | 417 | -- | -- |
|                                                | Sept | -- | -- | --  | 435 | 270 | 88   | 49  | 36  | 29  | 32  | 35  | 54  | 103  | 250  | 400 | --  | -- | -- |
|                                                | Oct  | -- | -- | --  | --  | 435 | 303  | 125 | 79  | 63  | 64  | 84  | 127 | 270  | 435  | --  | --  | -- | -- |
|                                                | Nov  | -- | -- | --  | --  | --  | 588  | 370 | 196 | 145 | 152 | 200 | 313 | 1111 | --   | --  | --  | -- | -- |
|                                                | Dec  | -- | -- | --  | --  | --  | 2000 | 556 | 323 | 222 | 217 | 270 | 588 | 2000 | --   | --  | --  | -- | -- |

|                                            |      |     |       |       |       |       |       |     |     |     |     |     |     |      |       |       |       |      |    |
|--------------------------------------------|------|-----|-------|-------|-------|-------|-------|-----|-----|-----|-----|-----|-----|------|-------|-------|-------|------|----|
| Stony Plain, Alberta<br>(53.55 N, 114.1 W) | Jan  | --  | --    | --    | --    | 10000 | 1667  | 526 | 256 | 196 | 196 | 270 | 500 | 1667 | n/a   | --    | --    | --   | -- |
|                                            | Feb  | --  | --    | --    | 10000 | 2000  | 476   | 185 | 116 | 93  | 92  | 118 | 192 | 435  | 2000  | n/a   | --    | --   | -- |
|                                            | Mar  | --  | --    | 10000 | 1429  | 417   | 139   | 78  | 52  | 43  | 44  | 53  | 78  | 147  | 385   | 1667  | n/a   | --   | -- |
|                                            | Apr  | --  | n/a   | 2000  | 526   | 130   | 70    | 45  | 34  | 30  | 30  | 36  | 49  | 78   | 156   | 435   | 1667  | --   | -- |
|                                            | May  | n/a | 3333  | 625   | 145   | 86    | 49    | 34  | 27  | 24  | 25  | 28  | 38  | 56   | 89    | 204   | 588   | 2000 | -- |
|                                            | June | n/a | 2500  | 625   | 128   | 66    | 43    | 29  | 23  | 21  | 21  | 23  | 30  | 44   | 78    | 161   | 400   | 1667 | -- |
|                                            | July | n/a | 2000  | 500   | 119   | 65    | 39    | 25  | 20  | 18  | 18  | 21  | 26  | 41   | 68    | 154   | 455   | 2000 | -- |
|                                            | Aug  | --  | 10000 | 1000  | 323   | 93    | 47    | 33  | 24  | 22  | 21  | 25  | 34  | 51   | 111   | 278   | 1000  | --   | -- |
|                                            | Sept | --  | --    | 10000 | 769   | 270   | 98    | 56  | 40  | 33  | 33  | 41  | 59  | 102  | 278   | 833   | 10000 | --   | -- |
|                                            | Oct  | --  | --    | --    | 10000 | 909   | 345   | 135 | 90  | 71  | 71  | 92  | 135 | 333  | 1000  | 10000 | --    | --   | -- |
|                                            | Nov  | --  | --    | --    | --    | 10000 | 1000  | 435 | 217 | 167 | 167 | 217 | 417 | 1250 | 10000 | --    | --    | --   | -- |
|                                            | Dec  | --  | --    | --    | --    | --    | 10000 | 833 | 385 | 294 | 294 | 417 | 833 | 3333 | n/a   | --    | --    | --   | -- |

Saturna Island, BC  
(48.78 N, 123.13 W)

|             |     |       |       |       |       |      |     |     |     |     |     |     |      |       |       |       |       |     |
|-------------|-----|-------|-------|-------|-------|------|-----|-----|-----|-----|-----|-----|------|-------|-------|-------|-------|-----|
| <b>Jan</b>  | --  | --    | --    | --    | 10000 | 1667 | 526 | 294 | 222 | 217 | 286 | 526 | 1667 | 10000 | --    | --    | --    | --  |
| <b>Feb</b>  | --  | --    | --    | 10000 | 2000  | 500  | 227 | 135 | 109 | 104 | 123 | 200 | 476  | 2000  | n/a   | --    | --    | --  |
| <b>Mar</b>  | --  | --    | 10000 | 2500  | 476   | 179  | 95  | 64  | 53  | 53  | 64  | 90  | 167  | 455   | 833   | n/a   | --    | --  |
| <b>Apr</b>  | --  | n/a   | 3333  | 476   | 156   | 72   | 43  | 31  | 27  | 27  | 31  | 42  | 71   | 152   | 476   | 3333  | n/a   | --  |
| <b>May</b>  | --  | 10000 | 714   | 233   | 94    | 50   | 32  | 23  | 20  | 20  | 23  | 30  | 46   | 85    | 200   | 625   | 5000  | n/a |
| <b>June</b> | n/a | 2500  | 417   | 152   | 66    | 39   | 26  | 20  | 17  | 17  | 19  | 25  | 36   | 65    | 152   | 476   | 3333  | n/a |
| <b>July</b> | n/a | 3333  | 400   | 149   | 63    | 35   | 22  | 17  | 15  | 15  | 17  | 22  | 32   | 59    | 139   | 435   | 3333  | n/a |
| <b>Aug</b>  | --  | 10000 | 1250  | 244   | 94    | 44   | 27  | 20  | 17  | 17  | 20  | 27  | 43   | 87    | 256   | 1111  | 10000 | --  |
| <b>Sept</b> | --  | --    | 10000 | 833   | 204   | 82   | 43  | 30  | 25  | 25  | 29  | 42  | 74   | 185   | 714   | 10000 | --    | --  |
| <b>Oct</b>  | --  | --    | --    | 10000 | 769   | 250  | 120 | 72  | 57  | 55  | 68  | 105 | 204  | 769   | 10000 | --    | --    | --  |
| <b>Nov</b>  | --  | --    | --    | --    | 10000 | 1111 | 417 | 217 | 167 | 169 | 213 | 370 | 1000 | 10000 | --    | --    | --    | --  |
| <b>Dec</b>  | --  | --    | --    | --    | n/a   | 2500 | 769 | 385 | 286 | 286 | 400 | 714 | 3333 | n/a   | --    | --    | --    | --  |

**Table 4: Duration (in min) required to synthesize the standard vitamin D dose of 1000 IU with 1/8 of the body exposed to 1/2 of the minimal erythral dose by site, time of day, and month in type V skinned individuals. Yellow areas represent periods when the ultraviolet index is above 3 and sun protection guidelines are recommended and gray areas represent periods when the ultraviolet index is below 3 and duration is greater than 60 min. There are no opportunities to synthesize vitamin D in less than 60 min when the ultraviolet index is below 3.**

| City                                          | Month | Time of Day |       |       |       |       |       |      |     |     |     |     |      |      |       |       |       |       |     |
|-----------------------------------------------|-------|-------------|-------|-------|-------|-------|-------|------|-----|-----|-----|-----|------|------|-------|-------|-------|-------|-----|
|                                               |       | 3           | 4     | 5     | 6     | 7     | 8     | 9    | 10  | 11  | 12  | 13  | 14   | 15   | 16    | 17    | 18    | 19    | 20  |
| Bedford/Dartmouth, NS<br>(44.7 N, 63.61 W)    | Jan   | --          | --    | --    | --    | 10000 | 1538  | 556  | 317 | 253 | 256 | 328 | 588  | 1538 | 6667  | --    | --    | --    | --  |
|                                               | Feb   | --          | --    | --    | 10000 | 2222  | 625   | 278  | 172 | 137 | 137 | 172 | 286  | 645  | 2500  | 20000 | --    | --    | --  |
|                                               | Mar   | --          | --    | --    | 3333  | 741   | 278   | 141  | 95  | 79  | 82  | 101 | 149  | 278  | 769   | 4000  | 20000 | --    | --  |
|                                               | Apr   | --          | --    | 5000  | 1111  | 357   | 150   | 92   | 65  | 57  | 57  | 67  | 93   | 160  | 364   | 1176  | 6667  | --    | --  |
|                                               | May   | --          | 10000 | 2000  | 526   | 208   | 105   | 64   | 50  | 42  | 43  | 50  | 67   | 106  | 198   | 500   | 2000  | 10000 | --  |
|                                               | June  | --          | 6667  | 1250  | 370   | 157   | 85    | 52   | 40  | 34  | 34  | 39  | 52   | 82   | 142   | 357   | 1333  | 10000 | --  |
|                                               | July  | --          | 10000 | 1538  | 392   | 163   | 84    | 51   | 39  | 34  | 34  | 39  | 51   | 79   | 141   | 364   | 1429  | 10000 | --  |
|                                               | Aug   | --          | --    | 2857  | 690   | 222   | 104   | 63   | 45  | 38  | 39  | 45  | 59   | 99   | 211   | 625   | 4000  | 20000 | --  |
|                                               | Sept  | --          | --    | 6667  | 1667  | 408   | 165   | 86   | 60  | 51  | 52  | 62  | 91   | 164  | 408   | 1818  | 10000 | --    | --  |
|                                               | Oct   | --          | --    | --    | 5000  | 1176  | 357   | 171  | 108 | 87  | 90  | 109 | 175  | 351  | 1250  | 6667  | --    | --    | --  |
|                                               | Nov   | --          | --    | --    | --    | 3333  | 1053  | 385  | 233 | 182 | 187 | 244 | 408  | 1053 | 5000  | --    | --    | --    | --  |
|                                               | Dec   | --          | --    | --    | --    | 10000 | 2222  | 741  | 385 | 299 | 308 | 408 | 769  | 2500 | 10000 | --    | --    | --    | --  |
| Goose Bay, Newfoundland<br>(53.32 N, 60.36 W) | Jan   | --          | --    | --    | --    | 20000 | 4000  | 1250 | 588 | 444 | 455 | 588 | 1111 | 3333 | n/a   | --    | --    | --    | --  |
|                                               | Feb   | --          | --    | --    | 20000 | 4000  | 1053  | 408  | 260 | 206 | 208 | 260 | 408  | 1000 | 4000  | n/a   | --    | --    | --  |
|                                               | Mar   | --          | --    | 20000 | 3333  | 909   | 308   | 172  | 118 | 99  | 99  | 116 | 165  | 313  | 870   | 3333  | n/a   | --    | --  |
|                                               | Apr   | --          | --    | 1667  | 833   | 290   | 148   | 93   | 69  | 59  | 59  | 68  | 92   | 145  | 290   | 667   | --    | --    | --  |
|                                               | May   | --          | --    | 1429  | 426   | 217   | 118   | 79   | 59  | 53  | 52  | 57  | 75   | 112  | 206   | 465   | 1000  | --    | --  |
|                                               | June  | --          | --    | 909   | 333   | 165   | 100   | 67   | 54  | 49  | 49  | 55  | 71   | 102  | 156   | 299   | 769   | --    | --  |
|                                               | July  | --          | --    | 1250  | 385   | 189   | 108   | 73   | 58  | 51  | 53  | 61  | 78   | 115  | 187   | 400   | 952   | --    | --  |
|                                               | Aug   | --          | --    | 1333  | 606   | 250   | 123   | 80   | 60  | 54  | 55  | 65  | 86   | 130  | 267   | 667   | --    | --    | --  |
|                                               | Sept  | --          | --    | 20000 | 2000  | 625   | 247   | 144  | 102 | 86  | 87  | 104 | 142  | 263  | 645   | 2000  | n/a   | --    | --  |
|                                               | Oct   | --          | --    | --    | 20000 | 2500  | 769   | 313  | 215 | 179 | 180 | 220 | 333  | 833  | 2500  | 20000 | --    | --    | --  |
|                                               | Nov   | --          | --    | --    | --    | 20000 | 2222  | 909  | 465 | 370 | 377 | 476 | 909  | 2500 | 20000 | --    | --    | --    | --  |
|                                               | Dec   | --          | --    | --    | --    | --    | 20000 | 1818 | 769 | 625 | 645 | 870 | 1667 | 6667 | --    | --    | --    | --    | --  |
| Montreal/Dorval, Quebec<br>(45.48 N, 73.75 W) | Jan   | --          | --    | --    | --    | --    | 1250  | 465  | 263 | 206 | 208 | 274 | 488  | 1333 | 10000 | n/a   | --    | --    | --  |
|                                               | Feb   | --          | --    | --    | --    | 641   | 513   | 227  | 142 | 114 | 114 | 145 | 233  | 513  | 2222  | 20000 | --    | --    | --  |
|                                               | Mar   | --          | --    | --    | 1818  | 571   | 222   | 114  | 80  | 66  | 67  | 82  | 124  | 222  | 606   | 4000  | n/a   | --    | --  |
|                                               | Apr   | --          | --    | 2500  | 909   | 317   | 136   | 82   | 60  | 51  | 51  | 60  | 82   | 141  | 308   | 952   | 10000 | n/a   | --  |
|                                               | May   | --          | --    | 1538  | 435   | 171   | 91    | 58   | 45  | 39  | 40  | 46  | 62   | 95   | 182   | 526   | 2000  | 20000 | --  |
|                                               | June  | --          | --    | 1053  | 333   | 144   | 77    | 48   | 37  | 33  | 34  | 39  | 51   | 74   | 138   | 364   | 1111  | 10000 | n/a |
|                                               | July  | --          | --    | 1111  | 339   | 140   | 76    | 48   | 38  | 34  | 34  | 39  | 52   | 78   | 144   | 392   | 1333  | 20000 | n/a |
|                                               | Aug   | --          | --    | 2000  | 556   | 198   | 90    | 56   | 42  | 37  | 36  | 43  | 59   | 98   | 190   | 606   | 4000  | n/a   | --  |
|                                               | Sept  | --          | --    | --    | 1429  | 408   | 163   | 85   | 62  | 53  | 55  | 65  | 96   | 168  | 476   | 2000  | 20000 | --    | --  |
|                                               | Oct   | --          | --    | --    | 4000  | 1176  | 377   | 179  | 114 | 93  | 96  | 119 | 183  | 400  | 1429  | 20000 | --    | --    | --  |
|                                               | Nov   | --          | --    | --    | --    | 2000  | 1111  | 444  | 256 | 206 | 206 | 263 | 465  | 1250 | 10000 | n/a   | --    | --    | --  |
|                                               | Dec   | --          | --    | --    | --    | --    | 1667  | 690  | 370 | 278 | 286 | 377 | 714  | 2222 | 20000 | --    | --    | --    | --  |



|                                                  |      |    |       |       |       |       |      |     |     |     |     |     |     |      |       |       |       |       |     |
|--------------------------------------------------|------|----|-------|-------|-------|-------|------|-----|-----|-----|-----|-----|-----|------|-------|-------|-------|-------|-----|
| Toronto/Downsview, Ontario<br>(43.78 N, 79.47 W) | Jan  | -- | --    | --    | --    | 10000 | 1429 | 500 | 278 | 211 | 215 | 282 | 500 | 1429 | 10000 | --    | --    | --    | --  |
|                                                  | Feb  | -- | --    | --    | 20000 | 2222  | 541  | 233 | 144 | 117 | 118 | 150 | 247 | 571  | 2222  | 8333  | --    | --    | --  |
|                                                  | Mar  | -- | --    | 20000 | 4000  | 714   | 238  | 125 | 85  | 72  | 72  | 90  | 132 | 253  | 690   | 4000  | 20000 | --    | --  |
|                                                  | Apr  | -- | n/a   | 6667  | 1053  | 323   | 139  | 83  | 59  | 51  | 51  | 60  | 84  | 142  | 308   | 1053  | 10000 | --    | --  |
|                                                  | May  | -- | 20000 | 2000  | 444   | 163   | 85   | 54  | 41  | 37  | 38  | 45  | 62  | 97   | 172   | 488   | 2000  | 20000 | --  |
|                                                  | June | -- | 20000 | 1250  | 345   | 140   | 72   | 46  | 35  | 32  | 33  | 38  | 51  | 80   | 143   | 385   | 1333  | 20000 | n/a |
|                                                  | July | -- | 20000 | 1250  | 328   | 129   | 68   | 45  | 34  | 31  | 32  | 37  | 49  | 78   | 144   | 392   | 1333  | 20000 | --  |
|                                                  | Aug  | -- | 20000 | 4000  | 588   | 189   | 88   | 53  | 41  | 36  | 37  | 42  | 58  | 94   | 189   | 645   | 4000  | 20000 | --  |
|                                                  | Sept | -- | --    | 20000 | 1667  | 385   | 145  | 80  | 56  | 48  | 49  | 58  | 85  | 152  | 400   | 1818  | 20000 | --    | --  |
|                                                  | Oct  | -- | --    | --    | 10000 | 1176  | 345  | 157 | 103 | 85  | 84  | 105 | 163 | 370  | 1333  | 10000 | --    | --    | --  |
|                                                  | Nov  | -- | --    | --    | n/a   | 6667  | 1053 | 364 | 222 | 172 | 180 | 235 | 408 | 1111 | 6667  | n/a   | --    | --    | --  |
|                                                  | Dec  | -- | --    | --    | --    | 20000 | 2222 | 690 | 339 | 256 | 260 | 357 | 769 | 2222 | 20000 | --    | --    | --    | --  |

|                                         |      |       |       |       |       |       |      |      |     |     |     |     |     |      |       |       |       |       |       |
|-----------------------------------------|------|-------|-------|-------|-------|-------|------|------|-----|-----|-----|-----|-----|------|-------|-------|-------|-------|-------|
| Winnipeg, Manitoba<br>(49.9 N, 97.24 W) | Jan  | --    | --    | --    | --    | 10000 | 2000 | 588  | 323 | 253 | 247 | 308 | 526 | 2000 | 20000 | --    | --    | --    | --    |
|                                         | Feb  | --    | --    | --    | 20000 | 3333  | 606  | 274  | 172 | 138 | 136 | 169 | 270 | 588  | 3333  | 20000 | --    | --    | --    |
|                                         | Mar  | --    | --    | 20000 | 3333  | 625   | 253  | 137  | 92  | 77  | 76  | 93  | 137 | 256  | 645   | 4000  | 20000 | --    | --    |
|                                         | Apr  | --    | 20000 | 4000  | 833   | 290   | 138  | 82   | 60  | 52  | 53  | 61  | 85  | 142  | 299   | 769   | 5000  | 20000 | --    |
|                                         | May  | --    | 10000 | 1429  | 392   | 169   | 91   | 63   | 49  | 44  | 44  | 50  | 64  | 100  | 183   | 426   | 1111  | 10000 | --    |
|                                         | June | 20000 | 5000  | 870   | 313   | 141   | 79   | 53   | 41  | 37  | 37  | 45  | 60  | 86   | 150   | 323   | 800   | 4000  | 20000 |
|                                         | July | --    | 6667  | 909   | 308   | 134   | 72   | 49   | 39  | 35  | 35  | 40  | 52  | 81   | 148   | 345   | 833   | 6667  | --    |
|                                         | Aug  | --    | 20000 | 2500  | 455   | 192   | 95   | 59   | 45  | 39  | 40  | 47  | 64  | 103  | 200   | 526   | 2500  | 20000 | --    |
|                                         | Sept | --    | --    | 10000 | 1818  | 370   | 172  | 96   | 68  | 59  | 60  | 73  | 107 | 190  | 435   | 1818  | 20000 | --    | --    |
|                                         | Oct  | --    | --    | --    | 10000 | 1818  | 426  | 227  | 144 | 119 | 120 | 148 | 235 | 488  | 1667  | 20000 | --    | --    | --    |
|                                         | Nov  | --    | --    | --    | --    | 10000 | 1667 | 488  | 303 | 225 | 233 | 290 | 500 | 1667 | 20000 | --    | --    | --    | --    |
|                                         | Dec  | --    | --    | --    | --    | 20000 | 4000 | 1000 | 500 | 370 | 364 | 500 | 909 | 3333 | 20000 | --    | --    | --    | --    |

|                                           |      |       |       |       |       |       |      |      |      |      |      |      |       |       |       |       |       |       |       |
|-------------------------------------------|------|-------|-------|-------|-------|-------|------|------|------|------|------|------|-------|-------|-------|-------|-------|-------|-------|
| Churchill, Manitoba<br>(58.75 N, 94.07 W) | Jan  | --    | --    | --    | --    | 10000 | 2000 | 1000 | 769  | 769  | 1053 | 2222 | 10000 | --    | --    | --    | --    | --    | --    |
|                                           | Feb  | --    | --    | --    | --    | 10000 | 1176 | 625  | 328  | 274  | 274  | 345  | 556   | 1176  | 10000 | --    | --    | --    | --    |
|                                           | Mar  | --    | --    | 10000 | 2500  | 714   | 317  | 165  | 122  | 103  | 102  | 120  | 169   | 313   | 690   | 2857  | 20000 | --    | --    |
|                                           | Apr  | --    | 20000 | 2000  | 625   | 241   | 137  | 84   | 64   | 56   | 57   | 65   | 84    | 130   | 247   | 606   | 2857  | 20000 | --    |
|                                           | May  | 20000 | 2857  | 952   | 333   | 172   | 96   | 68   | 54   | 48   | 49   | 53   | 67    | 97    | 165   | 323   | 833   | 3333  | 20000 |
|                                           | June | 6667  | 1429  | 500   | 260   | 153   | 91   | 65   | 53   | 47   | 47   | 52   | 63    | 89    | 144   | 247   | 606   | 2222  | 6667  |
|                                           | July | 20000 | 1818  | 714   | 299   | 168   | 93   | 66   | 53   | 48   | 49   | 53   | 66    | 94    | 155   | 286   | 714   | 2500  | 20000 |
|                                           | Aug  | --    | 10000 | 1667  | 571   | 253   | 144  | 91   | 72   | 65   | 66   | 73   | 95    | 148   | 267   | 606   | 1667  | 10000 | --    |
|                                           | Sept | --    | --    | 10000 | 1818  | 714   | 339  | 200  | 135  | 119  | 115  | 136  | 194   | 333   | 714   | 2222  | 20000 | --    | --    |
|                                           | Oct  | --    | --    | --    | 20000 | 5000  | 1053 | 526  | 317  | 263  | 270  | 333  | 526   | 1053  | 5000  | 10000 | --    | --    | --    |
|                                           | Nov  | --    | --    | --    | --    | 20000 | 6667 | 1429 | 769  | 588  | 588  | 769  | 1538  | 6667  | 20000 | --    | --    | --    | --    |
|                                           | Dec  | --    | --    | --    | --    | 20000 | 5000 | 1818 | 1250 | 1250 | 1250 | 1818 | 4000  | 20000 | --    | --    | --    | --    | --    |



|                                                             |      |    |      |       |      |      |      |     |     |     |     |     |     |      |      |      |      |    |    |    |    |    |
|-------------------------------------------------------------|------|----|------|-------|------|------|------|-----|-----|-----|-----|-----|-----|------|------|------|------|----|----|----|----|----|
| Bratts Lake (Regina), Saskatchewan<br>(50.205 N, 104.705 W) | Jan  | -- | --   | --    | --   | --   | 1111 | 500 | 278 | 211 | 217 | 286 | 513 | 1250 | --   | --   | --   | -- | -- |    |    |    |
|                                                             | Feb  | -- | --   | --    | --   | 1250 | 526  | 244 | 147 | 117 | 123 | 153 | 250 | 571  | 1429 | --   | --   | -- | -- | -- |    |    |
|                                                             | Mar  | -- | --   | --    | 1538 | 571  | 211  | 113 | 77  | 66  | 65  | 77  | 114 | 211  | 571  | 1333 | --   | -- | -- | -- | -- |    |
|                                                             | Apr  | -- | --   | 20000 | 769  | 274  | 130  | 80  | 58  | 51  | 54  | 61  | 84  | 135  | 274  | 833  | 2000 | -- | -- | -- | -- | -- |
|                                                             | May  | -- | --   | 1053  | 385  | 163  | 84   | 59  | 45  | 41  | 41  | 47  | 61  | 93   | 168  | 400  | 1176 | -- | -- | -- | -- | -- |
|                                                             | June | -- | 2222 | 870   | 303  | 136  | 77   | 56  | 40  | 38  | 38  | 44  | 58  | 80   | 137  | 290  | 952  | -- | -- | -- | -- | -- |
|                                                             | July | -- | --   | 833   | 270  | 123  | 68   | 46  | 35  | 32  | 33  | 38  | 47  | 70   | 124  | 286  | 909  | -- | -- | -- | -- | -- |
|                                                             | Aug  | -- | --   | 1538  | 488  | 185  | 91   | 58  | 43  | 37  | 37  | 42  | 57  | 90   | 177  | 500  | 1333 | -- | -- | -- | -- | -- |
|                                                             | Sept | -- | --   | --    | 1176 | 400  | 171  | 98  | 66  | 56  | 57  | 65  | 93  | 161  | 408  | 1111 | --   | -- | -- | -- | -- |    |
|                                                             | Oct  | -- | --   | --    | --   | 1176 | 465  | 215 | 138 | 112 | 114 | 139 | 225 | 488  | 1053 | --   | --   | -- | -- | -- | -- |    |
|                                                             | Nov  | -- | --   | --    | --   | --   | 1250 | 500 | 286 | 220 | 220 | 278 | 500 | 1000 | --   | --   | --   | -- | -- | -- |    |    |
|                                                             | Dec  | -- | --   | --    | --   | --   | --   | 800 | 435 | 339 | 345 | 455 | 833 | 2000 | --   | --   | --   | -- | -- | -- |    |    |

|                                                |      |    |    |      |      |     |      |      |     |     |     |     |      |      |      |     |     |    |    |    |    |    |    |
|------------------------------------------------|------|----|----|------|------|-----|------|------|-----|-----|-----|-----|------|------|------|-----|-----|----|----|----|----|----|----|
| Saskatoon, Saskatchewan<br>(52.11 N, 106.71 W) | Jan  | -- | -- | --   | --   | --  | 2222 | 714  | 400 | 303 | 308 | 400 | 625  | 2500 | --   | --  | --  | -- | -- | -- |    |    |    |
|                                                | Feb  | -- | -- | --   | --   | --  | 667  | 303  | 194 | 150 | 153 | 187 | 308  | 571  | 2500 | --  | --  | -- | -- | -- | -- |    |    |
|                                                | Mar  | -- | -- | --   | 1111 | 690 | 274  | 145  | 99  | 83  | 82  | 103 | 155  | 294  | 645  | --  | --  | -- | -- | -- | -- |    |    |
|                                                | Apr  | -- | -- | --   | 870  | 317 | 152  | 91   | 68  | 61  | 56  | 70  | 92   | 153  | 333  | 833 | --  | -- | -- | -- | -- | -- |    |
|                                                | May  | -- | -- | 1053 | 408  | 165 | 91   | 63   | 49  | 44  | 45  | 51  | 64   | 98   | 185  | 392 | 909 | -- | -- | -- | -- | -- | -- |
|                                                | June | -- | -- | 800  | 267  | 132 | 80   | 54   | 42  | 38  | 39  | 45  | 56   | 92   | 133  | 308 | 769 | -- | -- | -- | -- | -- | -- |
|                                                | July | -- | -- | 833  | 267  | 123 | 75   | 51   | 40  | 37  | 36  | 40  | 52   | 82   | 146  | 294 | 769 | -- | -- | -- | -- | -- | -- |
|                                                | Aug  | -- | -- | 1053 | 588  | 183 | 93   | 60   | 46  | 42  | 41  | 47  | 66   | 91   | 220  | 571 | 833 | -- | -- | -- | -- | -- | -- |
|                                                | Sept | -- | -- | --   | 870  | 541 | 177  | 99   | 71  | 58  | 63  | 70  | 108  | 206  | 500  | 800 | --  | -- | -- | -- | -- | -- |    |
|                                                | Oct  | -- | -- | --   | --   | 870 | 606  | 250  | 157 | 127 | 127 | 168 | 253  | 541  | 870  | --  | --  | -- | -- | -- | -- |    |    |
|                                                | Nov  | -- | -- | --   | --   | --  | 1176 | 741  | 392 | 290 | 303 | 400 | 625  | 2222 | --   | --  | --  | -- | -- | -- |    |    |    |
|                                                | Dec  | -- | -- | --   | --   | --  | 4000 | 1111 | 645 | 444 | 435 | 541 | 1176 | 4000 | --   | --  | --  | -- | -- | -- |    |    |    |

|                                            |      |     |       |       |       |       |       |      |     |     |     |     |      |      |       |       |       |      |    |    |    |    |    |    |
|--------------------------------------------|------|-----|-------|-------|-------|-------|-------|------|-----|-----|-----|-----|------|------|-------|-------|-------|------|----|----|----|----|----|----|
| Stony Plain, Alberta<br>(53.55 N, 114.1 W) | Jan  | --  | --    | --    | --    | 20000 | 3333  | 1053 | 513 | 392 | 392 | 541 | 1000 | 3333 | n/a   | --    | --    | --   | -- | -- | -- |    |    |    |
|                                            | Feb  | --  | --    | --    | 20000 | 4000  | 952   | 370  | 233 | 185 | 183 | 235 | 385  | 870  | 4000  | n/a   | --    | --   | -- | -- | -- | -- |    |    |
|                                            | Mar  | --  | --    | 20000 | 2857  | 833   | 278   | 156  | 105 | 87  | 87  | 106 | 155  | 294  | 769   | 3333  | n/a   | --   | -- | -- | -- | -- | -- |    |
|                                            | Apr  | --  | n/a   | 4000  | 1053  | 260   | 140   | 90   | 68  | 59  | 61  | 73  | 97   | 155  | 313   | 870   | 3333  | --   | -- | -- | -- | -- | -- |    |
|                                            | May  | n/a | 6667  | 1250  | 290   | 172   | 98    | 68   | 54  | 48  | 49  | 56  | 75   | 113  | 179   | 408   | 1176  | 4000 | -- | -- | -- | -- | -- | -- |
|                                            | June | n/a | 5000  | 1250  | 256   | 132   | 87    | 58   | 47  | 42  | 42  | 46  | 59   | 89   | 156   | 323   | 800   | 3333 | -- | -- | -- | -- | -- | -- |
|                                            | July | n/a | 4000  | 1000  | 238   | 131   | 79    | 51   | 41  | 36  | 36  | 41  | 52   | 82   | 137   | 308   | 909   | 4000 | -- | -- | -- | -- | -- | -- |
|                                            | Aug  | --  | 20000 | 2000  | 645   | 187   | 93    | 66   | 49  | 43  | 43  | 49  | 68   | 103  | 222   | 556   | 2000  | --   | -- | -- | -- | -- | -- |    |
|                                            | Sept | --  | --    | 20000 | 1538  | 541   | 196   | 112  | 79  | 66  | 67  | 81  | 118  | 204  | 556   | 1667  | 20000 | --   | -- | -- | -- | -- | -- |    |
|                                            | Oct  | --  | --    | --    | 20000 | 1818  | 690   | 270  | 180 | 143 | 143 | 183 | 270  | 667  | 2000  | 20000 | --    | --   | -- | -- | -- | -- |    |    |
|                                            | Nov  | --  | --    | --    | --    | 20000 | 2000  | 870  | 435 | 333 | 333 | 435 | 833  | 2500 | 20000 | --    | --    | --   | -- | -- | -- |    |    |    |
|                                            | Dec  | --  | --    | --    | --    | --    | 20000 | 1667 | 769 | 588 | 588 | 833 | 1667 | 6667 | n/a   | --    | --    | --   | -- | -- | -- |    |    |    |

Saturna Island, BC  
(48.78 N, 123.13 W)

|             |     |       |       |       |       |      |      |     |     |     |     |      |      |       |       |       |       |     |
|-------------|-----|-------|-------|-------|-------|------|------|-----|-----|-----|-----|------|------|-------|-------|-------|-------|-----|
| <b>Jan</b>  | --  | --    | --    | --    | 20000 | 3333 | 1053 | 588 | 444 | 435 | 571 | 1053 | 3333 | 20000 | --    | --    | --    | --  |
| <b>Feb</b>  | --  | --    | --    | 20000 | 4000  | 1000 | 455  | 270 | 217 | 208 | 247 | 400  | 952  | 4000  | n/a   | --    | --    | --  |
| <b>Mar</b>  | --  | --    | 20000 | 5000  | 952   | 357  | 190  | 127 | 106 | 106 | 128 | 180  | 333  | 909   | 1667  | n/a   | --    | --  |
| <b>Apr</b>  | --  | n/a   | 6667  | 952   | 313   | 145  | 87   | 63  | 55  | 54  | 62  | 84   | 142  | 303   | 952   | 6667  | n/a   | --  |
| <b>May</b>  | --  | 20000 | 1429  | 465   | 189   | 101  | 63   | 47  | 40  | 40  | 45  | 60   | 91   | 169   | 400   | 1250  | 10000 | n/a |
| <b>June</b> | n/a | 5000  | 833   | 303   | 132   | 78   | 51   | 39  | 34  | 33  | 37  | 50   | 71   | 130   | 303   | 952   | 6667  | n/a |
| <b>July</b> | n/a | 6667  | 800   | 299   | 127   | 70   | 45   | 34  | 30  | 30  | 34  | 43   | 64   | 118   | 278   | 870   | 6667  | n/a |
| <b>Aug</b>  | --  | 20000 | 2500  | 488   | 189   | 88   | 54   | 40  | 34  | 34  | 39  | 53   | 86   | 174   | 513   | 2222  | 20000 | --  |
| <b>Sept</b> | --  | --    | 20000 | 1667  | 408   | 164  | 87   | 60  | 51  | 50  | 58  | 84   | 148  | 370   | 1429  | 20000 | --    | --  |
| <b>Oct</b>  | --  | --    | --    | 20000 | 1538  | 500  | 241  | 144 | 114 | 110 | 136 | 211  | 408  | 1538  | 20000 | --    | --    | --  |
| <b>Nov</b>  | --  | --    | --    | --    | 20000 | 2222 | 833  | 435 | 333 | 339 | 426 | 741  | 2000 | 20000 | --    | --    | --    | --  |
| <b>Dec</b>  | --  | --    | --    | --    | n/a   | 5000 | 1538 | 769 | 571 | 571 | 800 | 1429 | 6667 | n/a   | --    | --    | --    | --  |
